# Supplementary material for: Reoperation after oesophageal cancer surgery in relation to long-term survival: a population-based cohort study
Source: PubMed Central journal article supplement — BMJ Open. 2014 Mar 20;4(3):e004648. doi: 10.1136/bmjopen-2013-004648 (PMC3963069; doi:10.1136/bmjopen-2013-004648), 2014-03-20
Supplement: bmjopen-2013-004648.draft_revisions.pdf [file bmjopen-2013-004648.draft_revisions.pdf]

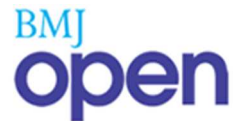

**Reoperation after oesophageal cancer surgery in relation to long-term survival: a population-based cohort study**

|                                 |                                                                                                                                                                                                                                                                                                                                                                                                                                                                                                                                                                                                                                                                                                                                                                                                 |
|---------------------------------|-------------------------------------------------------------------------------------------------------------------------------------------------------------------------------------------------------------------------------------------------------------------------------------------------------------------------------------------------------------------------------------------------------------------------------------------------------------------------------------------------------------------------------------------------------------------------------------------------------------------------------------------------------------------------------------------------------------------------------------------------------------------------------------------------|
| Journal:                        | <i>BMJ Open</i>                                                                                                                                                                                                                                                                                                                                                                                                                                                                                                                                                                                                                                                                                                                                                                                 |
| Manuscript ID:                  | bmjopen-2013-004648                                                                                                                                                                                                                                                                                                                                                                                                                                                                                                                                                                                                                                                                                                                                                                             |
| Article Type:                   | Research                                                                                                                                                                                                                                                                                                                                                                                                                                                                                                                                                                                                                                                                                                                                                                                        |
| Date Submitted by the Author:   | 09-Dec-2013                                                                                                                                                                                                                                                                                                                                                                                                                                                                                                                                                                                                                                                                                                                                                                                     |
| Complete List of Authors:       | van der Schaaf, Maartje; Karolinska Institutet, Department of Molecular Medicine and Surgery<br>Derogar, Maryam; Karolinska Institutet, Department of Molecular Medicine and Surgery<br>Johar, Asif; Karolinska Institutet, Department of Molecular Medicine and Surgery<br>Rutegård, Martin; Karolinska Institutet, Department of Molecular Medicine and Surgery<br>Gossage, James; St. Thomas' Hospital, London, Department of Surgery<br>Mason, Robert; St. Thomas' Hospital, London, Department of Surgery<br>Lagergren, Pernilla; Karolinska Institute, Department of Molecular Medicine and Surgery<br>Lagargren, Jesper; KAROLINSKA INSTITUTET, Unit of Upper Gastrointestinal Research. Department of Molecular Medicine and Surgery; King's College London, Division of Cancer Studies |
| <b>Primary Subject Heading</b>: | Surgery                                                                                                                                                                                                                                                                                                                                                                                                                                                                                                                                                                                                                                                                                                                                                                                         |
| Secondary Subject Heading:      | Oncology, Gastroenterology and hepatology                                                                                                                                                                                                                                                                                                                                                                                                                                                                                                                                                                                                                                                                                                                                                       |
| Keywords:                       | Gastrointestinal tumours < GASTROENTEROLOGY, Oesophageal disease < GASTROENTEROLOGY, SURGERY, Adverse events < THERAPEUTICS                                                                                                                                                                                                                                                                                                                                                                                                                                                                                                                                                                                                                                                                     |
|                                 |                                                                                                                                                                                                                                                                                                                                                                                                                                                                                                                                                                                                                                                                                                                                                                                                 |

SCHOLARONE™  
Manuscripts

1  
2  
3  
4  
5  
6  
7  
8  
9  
10  
11  
12  
13  
14  
15  
16  
17  
18  
19  
20  
21  
22  
23  
24  
25  
26  
27  
28  
29  
30  
31  
32  
33  
34  
35  
36  
37  
38  
39  
40  
41  
42  
43  
44  
45  
46  
47  
48  
49  
50  
51  
52  
53  
54  
55  
56  
57  
58  
59  
60

## Reoperation after oesophageal cancer surgery in relation to long-term survival: a population-based cohort study

**Authors:** Maartje van der Schaaf<sup>1</sup>, Maryam Derogar<sup>1</sup>, Asif Johar<sup>1</sup>, Martin Rutegård<sup>1</sup>, James Gossage<sup>2</sup>, Robert M. Mason<sup>2</sup>, Pernilla Lagergren<sup>1</sup>, and Jesper Lagergren<sup>1, 2, 3</sup>

**Affiliations:** <sup>1</sup>Department of Molecular Medicine and Surgery, Karolinska Institutet, Stockholm, Sweden. <sup>2</sup> Department of Surgery, St. Thomas' Hospital, London, United Kingdom. <sup>3</sup> Division of Cancer Studies, King's College London, London, United Kingdom.

**Corresponding author:**

Maartje van der Schaaf

Address: Department of Molecular Medicine and Surgery, Karolinska Institutet.

Norra Stationsgatan 67, level 2, SE-171 76 Stockholm, Sweden.

Telephone: +46 (0)8-517 70983

Fax: +46 (0)8-517 76280

E-mail: maartje.van.der.schaaf@ki.se

**Key words:** Oesophageal neoplasm; oesophageal resection; oesophagectomy; complication; long-term outcome; population-based, cohort

**Word count:** 1908

## ABSTRACT

**Objectives:** The influence of reoperation on longer-term prognosis is unknown. In this large population-based cohort study it was aimed to investigate the influence of a reoperation, following oesophageal cancer resection, on survival even after excluding the initial postoperative period.

**Design:** This was a nation-wide population-based retrospective cohort study

**Setting:** All hospitals performing oesophageal cancer resections during the study period (1987-2010) in Sweden

**Participants:** Patients operated for oesophageal cancer with curative intent in 1987-2010

**Primary and secondary outcomes:** Adjusted hazard ratio's (HR) of all cause, early- and late mortality up to 5-years after reoperation following oesophageal cancer resection.

**Results:** Some 2195 patients were identified as eligible in the study cohort. After exclusion of 373 patients (17%) where medical records were not available or where exposure data were missing, 1822 (83%) patients remained for final analysis. Among the 1484 patients who died during the entire study period, 1246 (84%) had documented tumour recurrence, which means that the all-cause mortality within 5 years closely mirrors disease-specific mortality. Compared to patients not undergoing reoperation, the 200 (11%) reoperated patients had a 27% increased hazard of death 3 months to 5 years after surgery (adjusted HR 1.27 95% CI 1.05-1.53), and the log-rank

1  
2  
3 test comparing the Kaplan Meier curves confirmed a worse prognosis (p  
4  
5 <0.0001).  
6  
7

8 **Conclusion:** This large and population-based nationwide cohort study with  
9  
10 adjustment for potential confounding factors revealed that reoperation was  
11  
12 associated with a worse prognosis, even after the initial 3 months of the  
13  
14 oesophageal cancer resection. This finding stresses the need to consider any  
15  
16 actions that might prevent complications and reoperation.  
17  
18  
19  
20  
21  
22  
23  
24  
25  
26  
27  
28  
29  
30  
31  
32  
33  
34  
35  
36  
37  
38  
39  
40  
41  
42  
43  
44  
45  
46  
47  
48  
49  
50  
51  
52  
53  
54  
55  
56  
57  
58  
59  
60

## STRENGTH AND LIMITATIONS OF THE STUDY

- The main strength of the study was the large cohort facilitated by the population-based design
- It was possible to adjust for important confounding factors
- Data on complications other than reoperation lacked
- The main limitation was the retrospective and observational design

## INTRODUCTION

Despite recent developments in multimodal therapy, surgical tumour resection is still the mainstay of treatment for localized oesophageal cancer[1]. While postoperative mortality has decreased to less than 5% in recent years[2], oesophageal resection still carries a considerable risk for post-operative complications, some of which require reoperation[1 3 4]. Major postoperative complications are known to negatively influence short-term survival[2], but evidence of the influence of such complications on long-term survival is inconsistent[5-8]. A recent study from our group suggested that surgical complications after oesophageal cancer resection might be an independent predictor for a poorer long-term survival[9].

The potential role of reoperation is uncertain, but there are biological mechanisms by which reoperation might decrease long-term survival. The additional surgical trauma that further triggers an inflammatory response could pave the way for early recurrence from micro metastases[10], and the major surgical complications that cause the need for reoperation might directly facilitate tumour recurrence, e.g. anastomotic insufficiency might entail direct tumour spread[9 11].

Therefore, we hypothesised that reoperation within 30 days after initial oesophageal resection negatively influences long-term survival.

## METHODS

### Study design

This was a retrospective population-based cohort study. The study cohort has previously been presented in detail [12 13]. All patients having undergone oesophagectomy for oesophageal cancer during the period 1987-2010 in Sweden were included in the study. Eligible patients were followed up until death or end of the study (28<sup>th</sup> February 2012), whichever occurred first.

### Study population

Oesophageal cancer patients were identified from the Swedish Cancer Registry, a registry with 98% nationwide coverage of oesophageal cancer patients[14 15]. Tumours of the gastric cardia were not included. Oesophageal cancer was defined by the diagnosis code 150.0, 150.8, and 150.9 in the 7<sup>th</sup> version of the International Classification of Diseases (ICD7). The identified patients were linked with the Swedish Patient Registry to include only those who underwent oesophageal resection in the final study cohort. Our group has recently reported that the Patient Registry has a positive predictive value of 99.6% for assessing oesophageal cancer resection[16]. Detailed information on tumour characteristics and surgical details were acquired through manual review of medical records from the operation charts and histopathology reports retrieved from all relevant hospitals throughout Sweden. The Patient Registry was used to obtain information on reoperations after the primary oesophageal resection and on comorbidities. Detailed information about indications for reoperation was not available. To calculate survival time after oesophagectomy, dates of death

1  
2  
3 were collected from the Swedish Causes of Death Registry. This register is  
4 complete and is updated continuously facilitating availability of accurate dates  
5 of death. The unique 10-digit Swedish personal identity number, assigned to  
6 every resident in Sweden since 1947[17], was used for linkage of individuals  
7 between registries and for identification of the patients' hospital records.  
8  
9  
10  
11  
12

### 13 14 15 16 **Study exposure and outcome**

17 The exposure was defined as any open or minimally invasive reoperation  
18 within 30 days of initial oesophageal cancer resection. Exposure was defined  
19 according to the Classification of Surgical Procedures. More specifically,  
20 reoperation was categorised as: 1) Explorative laparotomy (ICD10 JAH00,  
21 JAK00), 2) explorative thoracotomy (ICD10 GAB13, GAB96, GAB10), 3)  
22 reoperation for bleeding (ICD10 JWE00, GWE00), 4) reoperation for  
23 anastomotic insufficiency (ICD10 JWF00, GWF00, DWF00, 5) reoperation for  
24 wound revision (ICD10 JWA00), or 6) reoperation for deep infection (ICD10  
25 GWC00, GCW01, JWC00) (Table1).  
26  
27  
28  
29  
30  
31  
32  
33  
34  
35  
36  
37

38 The study outcome was all-cause early- and late mortality.

39 "Early postoperative mortality" was defined as any death occurring within 90  
40 days of initial surgery, while "late mortality" was defined as any death between  
41 90 days and 5 years of the primary resection. Since tumour recurrence is a  
42 less likely explanation for mortality 5 years and later after oesophageal cancer  
43 surgery, we decided to use 5 years as cut-off. The Regional Ethical Review  
44 Board in Stockholm, Sweden approved the study.  
45  
46  
47  
48  
49  
50  
51  
52  
53  
54

### 55 56 **Statistical analysis**

57  
58  
59  
60



1  
2  
3 Survival was calculated using the Kaplan-Meier method, and differences in  
4 survival between the survival curves of patients with and without reoperation  
5 were evaluated using the log rank test. In a Cox proportional hazards  
6 regression model, hazard ratios (HR's) with 95% confidence intervals (CI's)  
7 were calculated, including adjustment for potential confounding factors in a  
8 multivariable model. In the Cox model the proportionality assumption was  
9 tested. The factors adjusted for were nine known prognostic factors. They  
10 were categorised as follows: 1) age (categorised into three groups: <65, 65-75,  
11 or >75 years), 2) sex, 3) comorbidity (including any of: hypertension, ischemic  
12 heart disease, cardiac failure, chronic obstructive pulmonary disease, asthma,  
13 diabetes, former cancer diagnosis, human immunodeficiency virus, liver  
14 disease and renal disease; and categorised into three groups: none, one, or  
15 two or more), 4) tumour stage (classified according to the 6<sup>th</sup> version of the  
16 Union for International Cancer Control -TNM classification; and categorised  
17 into four groups: 0-I, II, III, or IV), 5) histological type of tumour (categorised  
18 into two groups: squamous cell carcinoma or adenocarcinoma), 6)  
19 neoadjuvant therapy (yes or no), 7) surgical radicality (R0 or not R0), 8)  
20 hospital volume (<9 or ≥9 per year), and 9) calendar period (1987-1996 or  
21 1996-2005).

22  
23  
24  
25  
26  
27  
28  
29  
30  
31  
32  
33  
34  
35  
36  
37  
38  
39  
40  
41  
42  
43  
44  
45  
46  
47  
48  
49  
50  
51  
52  
53  
54  
55  
56  
57  
58  
59  
60

Missing values in the covariates were treated as a separate group in the Cox regression model[18]. A sensitivity analysis was performed to compare the impact of categorising missing as a separate group against removing these missing values from the analysis.

All statistical analyses were done using STATA 11 for Mac (STATAcorp College Station, Texas).

## RESULTS

### Patients

Some 2195 patients were identified as eligible in the study cohort of oesophageal cancer patients who underwent resection in Sweden during the study period. After exclusion of 373 patients (17%) where medical records were not available or where exposure data were missing, 1822 (83%) patients remained for final analysis. Of these, 200 patients (11%) were exposed for reoperation (in total 248 reoperations) within 30 days of the primary oesophageal resection (Table 1).

**Table 1.** Categorisation of the 200 reoperations within 30 days after initial surgery in a cohort of 1822 patients undergoing oesophagectomy between 1987 and 2010 in Sweden, with follow-up until 28<sup>th</sup> February 2012.

| Type of reoperation                       | Number (%) |
|-------------------------------------------|------------|
| Total number of reoperations              | 248 (100)  |
| Explorative laparotomy                    | 47 (19)    |
| Explorative thoracotomy                   | 11 (4)     |
| Reoperation for bleeding                  | 22 (9)     |
| Reoperation for anastomotic insufficiency | 43 (17)    |
| Laparotomy                                | 3          |
| Thoracotomy                               | 1          |
| Unknown/other                             | 39         |
| Reoperation for infection                 | 8 (3)      |
| Reoperation for wound revision            | 50 (20)    |
| Wound revision for bleeding               | 15         |
| Wound revision for infection              | 5          |
| Wound dehiscence                          | 7          |
| Unknown                                   | 23         |
| Other reoperations                        | 75 (30)    |

1  
2  
3 There were no major differences between the groups with and without  
4 reoperation regarding the distribution of sex, age, comorbidity, tumour stage,  
5 tumour histology, neo-adjuvant therapy, hospital volume, or calendar period  
6 (Table 2). Among the 1484 patients who died during the entire study period,  
7 1246 (84%) had documented tumour recurrence, which means that the all-  
8 cause mortality within 5 years closely mirrors disease-specific mortality. There  
9 were no missing values for reoperation (exposure) and missing values in  
10 covariates were missing at random. A sensitivity analysis was performed to  
11 compare the impact of categorising missing as a separate group against  
12 removing these missing values from the analysis, and the results were similar  
13 (data not shown). In the Cox model the proportionality assumption was tested  
14 and the model satisfied the assumption.  
15  
16  
17  
18  
19  
20  
21  
22  
23  
24  
25  
26  
27  
28  
29  
30  
31  
32  
33  
34  
35  
36  
37  
38  
39  
40  
41  
42  
43  
44  
45  
46  
47  
48  
49  
50  
51  
52  
53  
54  
55  
56  
57  
58  
59  
60

**Table 2.** Characteristics of 1822 patients undergoing oesophagectomy between 1987 and 2010 in Sweden, with follow-up until 28<sup>th</sup> February 2012

| Characteristics            | Number (%)     |             | P-value <sup>§</sup> |
|----------------------------|----------------|-------------|----------------------|
|                            | No reoperation | Reoperation |                      |
| <b>Total</b>               | 1622 (89)      | 200 (11)    |                      |
| <b>Sex</b>                 |                |             |                      |
| Men                        | 1211 (75)      | 151 (75)    | 0.8                  |
| Women                      | 411 (25)       | 49 (25)     |                      |
| <b>Age</b>                 |                |             |                      |
| ≤64                        | 754 (46)       | 93 (47)     | 0.9                  |
| 65-75                      | 615 (38)       | 78 (39)     |                      |
| >75                        | 253 (16)       | 29 (14)     |                      |
| <b>Comorbidity*</b>        |                |             |                      |
| None                       | 832 (51)       | 107 (54)    | 0.8                  |
| 1                          | 542 (34)       | 63 (31)     |                      |
| ≥2                         | 248 (15)       | 30 (15)     |                      |
| <b>Stage‡</b>              |                |             |                      |
| 0-I                        | 339 (20)       | 41 (20)     | 0.9                  |
| II                         | 532(33)        | 71 (35)     |                      |
| III                        | 399 (25)       | 46 (23)     |                      |
| IV                         | 127(8)         | 13 (7)      |                      |
| Missing <sup>†</sup>       | 225 (14)       | 29 (15)     |                      |
| <b>Histology</b>           |                |             |                      |
| Adenocarcinoma             | 645 (40)       | 70 (35)     | 0.09                 |
| Squamous cell carcinoma    | 880 (54)       | 123 (62)    |                      |
| Missing <sup>†</sup>       | 97 (6)         | 7 (3)       |                      |
| <b>Neoadjuvant therapy</b> |                |             |                      |
| None                       | 677 (42)       | 85 (43)     | 0.4                  |
| Radiotherapy               | 154 (9)        | 26 (13)     |                      |
| Chemoradiotherapy          | 302 (19)       | 35 (17)     |                      |
| Missing <sup>†</sup>       | 489 (30)       | 54 (27)     |                      |
| <b>Radicality</b>          |                |             |                      |
| R0                         | 1135 (69)      | 137 (68)    | 0.7                  |
| Not R0                     | 251 (16)       | 30 (15)     |                      |
| Missing <sup>†</sup>       | 236 (15)       | 33 (17)     |                      |
| <b>Hospital volume</b>     |                |             |                      |
| <9 per year                | 875 (54)       | 122 (61)    | 0.06                 |
| ≥9 per year                | 747 (46)       | 78 (39)     |                      |
| <b>Calendar period</b>     |                |             |                      |
| 1987-1990                  | 234 (14)       | 34 (17)     | 0.2                  |
| 1991-1994                  | 302 (19)       | 43 (22)     |                      |
| 1995-1999                  | 330 (20)       | 49 (25)     |                      |
| 2000-2005                  | 382(24)        | 37 (19)     |                      |
| 2006-2010                  | 374 (23)       | 37 (19)     |                      |

1  
2  
3 \*Comorbidity included: hypertension, ischemic heart disease, cardiac failure, chronic  
4 obstructive pulmonary disease, asthma, diabetes, former cancer diagnosis, human  
5 immunodeficiency virus, liver disease, and renal disease.

6  
7 † Missing values of covariates were missing at random and considered as a separate  
8 group.

9  
10 ‡Categorised according to the 6<sup>th</sup> version of the Union for International Cancer  
11 Control (UICC)-TNM classification.

12 § $\chi^2$  of the difference between groups  
13  
14  
15  
16  
17  
18  
19  
20  
21  
22  
23  
24  
25  
26  
27  
28  
29  
30  
31  
32  
33  
34  
35  
36  
37  
38  
39  
40  
41  
42  
43  
44  
45  
46  
47  
48  
49  
50  
51  
52  
53  
54  
55  
56  
57  
58  
59  
60

### Reoperation and risk of mortality

Among the 208 patients (11%) who died within 90 days of surgery, 54 (26%) underwent reoperation. Reoperation was a risk factor for 90-day mortality after adjustment for confounding factors (crude HR 3.17, adjusted HR 3.05, 95% CI 2.22-4.17). Among the 1276 (79%) patients who died between 90 days and 5 years after surgery 117 (10%) were reoperated. Among the 122 who died after 5 years of surgery 5 (4%) were reoperated. The log-rank test comparing the Kaplan-Meier survival curves of patients with and without reoperation between 90 days and 5 years after surgery revealed a statistically significantly increased mortality in the reoperated group ( $p < 0.0001$ ) (Figure 1, Table 3).

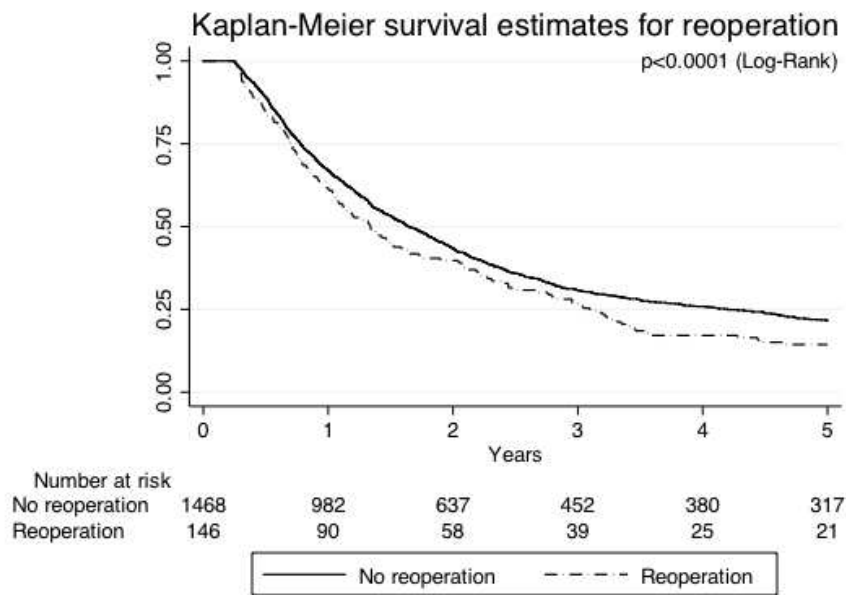

**Figure 1.** Kaplan-Meier survival curve for survival between 90 days and 5 years with respect to occurrence of reoperation among 1614 patients undergoing oesophageal cancer surgery in 1987-2010 in Sweden.

**Table 3.** Hazard ratios (HR) with 95% confidence intervals (95% CI) of mortality after oesophagectomy with respect to occurrence of reoperation, based on 1822 patients undergoing oesophageal cancer surgery in 1987-2012 in Sweden

| Reoperation                 | Number of patients (%) | Number of events (%) <sup>‡</sup> | HR (95% CI)      |
|-----------------------------|------------------------|-----------------------------------|------------------|
| <b>All stages</b>           |                        |                                   |                  |
| <90 days                    | 1822 (100)             | 208 (11)                          |                  |
| Crude                       |                        |                                   | 3.17 (2.32-4.32) |
| Multivariable* <sup>†</sup> |                        |                                   | 3.05 (2.22-4.17) |
| ≥90 days – 5 years          | 1614 (89)              | 1276 (79)                         |                  |
| Crude                       |                        |                                   | 1.22 (1.02-1.47) |
| Multivariable* <sup>†</sup> |                        |                                   | 1.27 (1.05-1.53) |
| >5 years                    | 338 (19)               | 127 (37)                          |                  |
| Crude                       |                        |                                   | 0.51 (0.21-1.25) |
| Multivariable* <sup>†</sup> |                        |                                   | 0.42 (0.17-1.07) |

\*Adjusted for sex, age, co-morbidities, tumour stage, histology, neoadjuvant therapy, radicality, hospital volume, and calendar period.

<sup>†</sup>Missing values of covariates were missing at random and considered as a separate group.

<sup>‡</sup>Event means death

As presented in Table 3, there was a 27% increased hazard of mortality during the period 90 days to 5 years after surgery after adjustment for all nine potential confounding factors (crude HR 1.22, adjusted HR 1.27, 95% CI 1.05-1.53). The risk of mortality after 5 years of surgery was not statistically significantly different in the two comparison groups (crude HR 0.51, adjusted HR 0.42 95% CI 0.17-1.07) (Table 3).

The proportional hazard assumption, tested using a non-zero slope, and time varying covariates were satisfied, and there were no statistically significant interaction effects with reoperation (data not shown).

## DISCUSSION

This is, to the best of our knowledge, the first study addressing reoperation in relation to late mortality after primary oesophageal cancer resection, and it revealed an increased long-term mortality in patients that underwent reoperation compared to those who did not.

Among strengths of this study is the population-based design, where most patients who underwent oesophageal cancer surgery in Sweden during 1987-2010 were included. The follow-up for mortality was complete by virtue of the availability of personal identity numbers for Swedish residents, together with the fully complete Swedish Causes of Death Registry. Another major strength is the possibility to adjust for several known prognostic factors, which reduces the risk of confounding. Moreover, the exposure and outcome were predefined, which reduces the risk of chance findings and decreases the risk of systematic errors owing to misclassification. Some limitations of the study require a discussion. The retrospective clinical data collection imposes a risk of misclassification and selection bias. The researchers involved in gathering the clinical information had, however, no link with the participating hospitals and were not involved in the patient care, which decreases these risks. A risk of residual confounding by known prognostic factors or confounding by unknown factors cannot be excluded in observational research due to the lack of randomization. There was for example no access to information on pre-operative performance status and nutritional status, which might have influenced the results[19]. Another limitation was the lack of information on complications, and thus the indication for the reoperations. Moreover, information on causes of death was lacking, but the vast majority of patients



1  
2  
3 that die within 5 years after surgery for oesophageal cancer do die from  
4 recurrent disease[9], and almost all patients who died within 5 years of  
5 surgery in the current study had documented tumour recurrence. Finally,  
6  
7 although the long study period offered good statistical power, it also entailed a  
8  
9 risk of bias by changes in surgical techniques and standards in patients care  
10  
11 over time. To counteract such effects, we adjusted all HRs for calendar period.  
12  
13 The limited rate of exposure to reoperation still meant that the exposure could  
14  
15 not be further subcategorised because of power issues.  
16  
17  
18  
19

20  
21 The finding of the prognostic role of reoperations after excluding the initial  
22  
23 postoperative period is a novel finding that should encourage further research.  
24  
25 No previous studies have, to the best of our knowledge, addressed the  
26  
27 influence of reoperations on long-term survival in oesophageal cancer patient.  
28  
29 However, the main indication for reoperation is the occurrence of severe  
30  
31 postoperative complications, and a few previous studies have assessed the  
32  
33 role of such complications on long-term survival. These have provided  
34  
35 conflicting results; some studies have reported a worse longer-term prognosis  
36  
37 after surgical complications[7 9], medical complications[10], or concurrent  
38  
39 surgical and medical complication[4], while others have not found any such  
40  
41 effect[6 8].  
42  
43  
44  
45

46  
47 One biological mechanism that might explain the decreased long-term  
48  
49 survival after reoperation is that the additional surgical injury reduces the  
50  
51 protection against seeding of tumour cells, including activation of natural killer  
52  
53 cells and other anti-carcinogenic factors[20]. Furthermore, it is possible that  
54  
55 additional surgery triggers an elevated inflammatory response that might in  
56  
57 turn stimulate growth of micro-tumours and induce tumour recurrence and  
58  
59  
60

1  
2  
3 death from recurrence[10]. Another potential mechanism considers certain  
4 complications. There is, for example, some evidence that anastomotic  
5 insufficiency entails direct tumour spread and seeding of remaining viable  
6 tumour cells in colon cancer patients[11 21].  
7  
8  
9  
10

11  
12 In conclusion, this nationwide and population-based cohort study with  
13 adjustment for several potential confounding factors indicates that reoperation  
14 is associated with an increased hazard of mortality even after the initial 3  
15 months of the oesophageal cancer resection. This finding warrants more  
16 research, but further stresses the need to consider any actions that might  
17 prevent complications requiring reoperation after the primary surgery in  
18 oesophageal cancer patients.  
19  
20  
21  
22  
23  
24  
25  
26  
27  
28  
29  
30  
31  
32  
33  
34  
35  
36  
37  
38  
39  
40  
41  
42  
43  
44  
45  
46  
47  
48  
49  
50  
51  
52  
53  
54  
55  
56  
57  
58  
59  
60

1  
2  
3 **Funding:** This study was funded by the Swedish Cancer Society and the  
4  
5 Swedish Research Council. No conflicts of interest were reported.  
6  
7

8 **Authors' individual contribution:**  
9

10  
11 Dr M. van der Schaaf and J. Lagergren, had full access to all of the data in the  
12  
13 study and take responsibility for the integrity of the data and the accuracy of  
14  
15 the data analysis. **Study concept and design:** M. van der Schaaf, J.  
16  
17 Lagergren, P. Lagergren, M. Rutegård, M. Derogar. **Acquisition of data:** P.  
18  
19 Lagergren, J. Lagergren, M. van der Schaaf, M. Derogar. **Analysis and**  
20  
21 **interpretation of data:** M. van der Schaaf, J. Lagergren, A. Johar. **Drafting**  
22  
23 **of the manuscript:** M. van der Schaaf, J. Lagergren. **Critical revision of the**  
24  
25 **manuscript for important intellectual content:** J. Gossage, R. Mason, M.  
26  
27 Rutegård, P. Lagergren. **Statistical analysis:** A. Johar, M. Derogar.  
28  
29  
30  
31 **Obtained funding:** J. Lagergren, P. Lagergren.  
32  
33  
34  
35  
36  
37  
38  
39  
40  
41  
42  
43  
44  
45  
46  
47  
48  
49  
50  
51  
52  
53  
54  
55  
56  
57  
58  
59  
60

## REFERENCES

1. Wu PC, Posner MC. The role of surgery in the management of oesophageal cancer. *Lancet Oncol* 2003;**4**(8):481-8 doi: S1470204503011677 [pii][published Online First: Epub Date]].
2. Schieman C, Wigle DA, Deschamps C, et al. Patterns of operative mortality following esophagectomy. *Dis Esophagus* 2012 doi: 10.1111/j.1442-2050.2011.01304.x[published Online First: Epub Date]].
3. GebSKI V, Burmeister B, Smithers BM, Foo K, Zalberg J, Simes J. Survival benefits from neoadjuvant chemoradiotherapy or chemotherapy in oesophageal carcinoma: a meta-analysis. *Lancet Oncol* 2007;**8**(3):226-34 doi: S1470-2045(07)70039-6 [pii]  
10.1016/S1470-2045(07)70039-6 [doi][published Online First: Epub Date]].
4. Lerut T, Moons J, Coosemans W, et al. Postoperative complications after transthoracic esophagectomy for cancer of the esophagus and gastroesophageal junction are correlated with early cancer recurrence: role of systematic grading of complications using the modified Clavien classification. *Ann Surg* 2009;**250**(5):798-807 doi: 10.1097/SLA.0b013e3181bdd5a8[published Online First: Epub Date]].
5. Hirai T, Yamashita Y, Mukaida H, Kuwahara M, Inoue H, Toge T. Poor prognosis in esophageal cancer patients with postoperative complications. *Surg Today* 1998;**28**(6):576-9
6. Ferri LE, Law S, Wong KH, Kwok KF, Wong J. The influence of technical complications on postoperative outcome and survival after esophagectomy. *Ann Surg Oncol* 2006;**13**(4):557-64 doi: 10.1245/ASO.2006.04.040[published Online First: Epub Date]].
7. Rizk NP, Bach PB, Schrag D, et al. The impact of complications on outcomes after resection for esophageal and gastroesophageal junction carcinoma. *J Am Coll Surg* 2004;**198**(1):42-50 doi: S1072-7515(03)00946-3 [pii]  
10.1016/j.jamcollsurg.2003.08.007[published Online First: Epub Date]].
8. Ancona E, Cagol M, Epifani M, et al. Surgical complications do not affect longterm survival after esophagectomy for carcinoma of the thoracic esophagus and cardia. *J Am Coll Surg* 2006;**203**(5):661-9 doi: S1072-7515(06)01154-9 [pii]  
10.1016/j.jamcollsurg.2006.07.017[published Online First: Epub Date]].
9. Rutegard M, Lagergren P, Rouvelas I, Lagergren J. Intrathoracic anastomotic leakage and mortality after esophageal cancer resection: a population-based study. *Ann Surg Oncol* 2012;**19**(1):99-103 doi: 10.1245/s10434-011-1926-6[published Online First: Epub Date]].
10. Lagarde SM, de Boer JD, ten Kate FJW, Busch ORC, Obertop H, van Lanschot JJB. Postoperative Complications After Esophagectomy for Adenocarcinoma of the Esophagus Are Related to Timing of Death Due to Recurrence. *Annals of Surgery* 2008;**247**(1):71-76 doi: 10.1097/SLA.0b013e31815b695e[published Online First: Epub Date]].
11. Walker KG, Bell SW, Rickard MJ, et al. Anastomotic leakage is predictive of diminished survival after potentially curative resection for colorectal cancer. *Ann Surg* 2004;**240**(2):255-9

- 1  
2  
3 12. Derogar M, Sadr-Azodi O, Johar A, Lagergren P, Lagergren J. Hospital and  
4 surgeon volume in relation to survival after esophageal cancer surgery in a  
5 population-based study. *J Clin Oncol* 2013;**31**(5):551-7 doi:  
6 10.1200/jco.2012.46.1517[published Online First: Epub Date]].  
7  
8 13. Rouvelas I, Zeng W, Lindblad M, Viklund P, Ye W, Lagergren J. Survival after  
9 surgery for oesophageal cancer: a population-based study. *Lancet Oncol*  
10 2005;**6**(11):864-70 doi: 10.1016/s1470-2045(05)70347-8[published Online  
11 First: Epub Date]].  
12 14. Barlow L, Westergren K, Holmberg L, Talback M. The completeness of the  
13 Swedish Cancer Register: a sample survey for year 1998. *Acta Oncol*  
14 2009;**48**(1):27-33 doi: 10.1080/02841860802247664[published Online First:  
15 Epub Date]].  
16 15. Lindblad M, Ye W, Lindgren A, Lagergren J. Disparities in the classification of  
17 esophageal and cardia adenocarcinomas and their influence on reported  
18 incidence rates. *Ann Surg* 2006;**243**(4):479-85 doi:  
19 10.1097/01.sla.0000205825.34452.43[published Online First: Epub Date]].  
20 16. Lagergren K, Derogar M. Validation of oesophageal cancer surgery data in the  
21 Swedish Patient Registry. *Acta Oncol* 2012;**51**(1):65-8 doi:  
22 10.3109/0284186x.2011.633932[published Online First: Epub Date]].  
23 17. Ludvigsson JF, Otterblad-Olausson P, Pettersson BU, Ekblom A. The Swedish  
24 personal identity number: possibilities and pitfalls in healthcare and medical  
25 research. *Eur J Epidemiol* 2009;**24**(11):659-67 doi: 10.1007/s10654-009-9350-  
26 y[published Online First: Epub Date]].  
27 18. Cohen JC, P. *Applied multiple regression/correlation analysis for the behavioral*  
28 *sciences (2nd edition)*: Hillsdale, NJ: Lawrence Erlbaum., 1983.  
29 19. Grotenhuis BA, Wijnhoven BP, Grune F, van Bommel J, Tilanus HW, van  
30 Lanschot JJ. Preoperative risk assessment and prevention of complications in  
31 patients with esophageal cancer. *J Surg Oncol* 2010;**101**(3):270-8 doi:  
32 10.1002/jso.21471[published Online First: Epub Date]].  
33 20. Abramovitch R, Marikovskiy M, Meir G, Neeman M. Stimulation of tumour  
34 growth by wound-derived growth factors. *Br J Cancer* 1999;**79**(9-10):1392-8  
35 doi: 10.1038/sj.bjc.6690223[published Online First: Epub Date]].  
36 21. McArdle CS, McMillan DC, Hole DJ. Impact of anastomotic leakage on long-  
37 term survival of patients undergoing curative resection for colorectal cancer. *Br J*  
38 *Surg* 2005;**92**(9):1150-4 doi: 10.1002/bjs.5054[published Online First: Epub  
39 Date]].  
40  
41  
42  
43  
44  
45  
46  
47  
48  
49  
50  
51  
52  
53  
54  
55  
56  
57  
58  
59  
60

| Section/topic                | #   | Recommendation                                                                                                                                                                                    | Reported on page # |
|------------------------------|-----|---------------------------------------------------------------------------------------------------------------------------------------------------------------------------------------------------|--------------------|
| Title and abstract           | 1   | (a) Indicate the study's design with a commonly used term in the title or the abstract                                                                                                            | 1                  |
|                              |     | (b) Provide in the abstract an informative and balanced summary of what was done and what was found                                                                                               | 2                  |
| <b>Introduction</b>          |     |                                                                                                                                                                                                   |                    |
| Background/rationale         | 2   | Explain the scientific background and rationale for the investigation being reported                                                                                                              | 5                  |
| Objectives                   | 3   | State specific objectives, including any prespecified hypotheses                                                                                                                                  | 5                  |
| <b>Methods</b>               |     |                                                                                                                                                                                                   |                    |
| Study design                 | 4   | Present key elements of study design early in the paper                                                                                                                                           | 6                  |
| Setting                      | 5   | Describe the setting, locations, and relevant dates, including periods of recruitment, exposure, follow-up, and data collection                                                                   | 6                  |
| Participants                 | 6   | (a) Give the eligibility criteria, and the sources and methods of selection of participants. Describe methods of follow-up                                                                        | 6-7                |
|                              |     | (b) For matched studies, give matching criteria and number of exposed and unexposed                                                                                                               | 6-8                |
| Variables                    | 7   | Clearly define all outcomes, exposures, predictors, potential confounders, and effect modifiers. Give diagnostic criteria, if applicable                                                          | 7-8                |
| Data sources/<br>measurement | 8*  | For each variable of interest, give sources of data and details of methods of assessment (measurement). Describe comparability of assessment methods if there is more than one group              | 6-8                |
| Bias                         | 9   | Describe any efforts to address potential sources of bias                                                                                                                                         | 8,11,12            |
| Study size                   | 10  | Explain how the study size was arrived at                                                                                                                                                         | 9                  |
| Quantitative variables       | 11  | Explain how quantitative variables were handled in the analyses. If applicable, describe which groupings were chosen and why                                                                      | 8                  |
| Statistical methods          | 12  | (a) Describe all statistical methods, including those used to control for confounding                                                                                                             | 8                  |
|                              |     | (b) Describe any methods used to examine subgroups and interactions                                                                                                                               | 8                  |
|                              |     | (c) Explain how missing data were addressed                                                                                                                                                       | 8                  |
|                              |     | (d) If applicable, explain how loss to follow-up was addressed                                                                                                                                    | -                  |
|                              |     | (e) Describe any sensitivity analyses                                                                                                                                                             | 8                  |
| <b>Results</b>               |     |                                                                                                                                                                                                   |                    |
| Participants                 | 13* | (a) Report numbers of individuals at each stage of study—eg numbers potentially eligible, examined for eligibility, confirmed eligible, included in the study, completing follow-up, and analysed | 9                  |
|                              |     | (b) Give reasons for non-participation at each stage                                                                                                                                              | 9                  |
|                              |     | (c) Consider use of a flow diagram                                                                                                                                                                | 17                 |
| Descriptive data             | 14* | (a) Give characteristics of study participants (eg demographic, clinical, social) and information on exposures and potential                                                                      | 9                  |

|                          |     |                                                                                                                                                                                                              |       |
|--------------------------|-----|--------------------------------------------------------------------------------------------------------------------------------------------------------------------------------------------------------------|-------|
|                          |     | confounders                                                                                                                                                                                                  |       |
|                          |     | (b) Indicate number of participants with missing data for each variable of interest                                                                                                                          | 9     |
|                          |     | (c) Summarise follow-up time (eg, average and total amount)                                                                                                                                                  |       |
| Outcome data             | 15* | Report numbers of outcome events or summary measures over time                                                                                                                                               | 9     |
| Main results             | 16  | (a) Give unadjusted estimates and, if applicable, confounder-adjusted estimates and their precision (eg, 95% confidence interval). Make clear which confounders were adjusted for and why they were included | 10,21 |
|                          |     | (b) Report category boundaries when continuous variables were categorized                                                                                                                                    | -     |
|                          |     | (c) If relevant, consider translating estimates of relative risk into absolute risk for a meaningful time period                                                                                             | -     |
| Other analyses           | 17  | Report other analyses done—eg analyses of subgroups and interactions, and sensitivity analyses                                                                                                               | 10    |
| <b>Discussion</b>        |     |                                                                                                                                                                                                              |       |
| Key results              | 18  | Summarise key results with reference to study objectives                                                                                                                                                     | 11    |
| <b>Limitations</b>       |     |                                                                                                                                                                                                              |       |
| Interpretation           | 20  | Give a cautious overall interpretation of results considering objectives, limitations, multiplicity of analyses, results from similar studies, and other relevant evidence                                   | 12-13 |
| Generalisability         | 21  | Discuss the generalisability (external validity) of the study results                                                                                                                                        | 12-13 |
| <b>Other information</b> |     |                                                                                                                                                                                                              |       |
| Funding                  | 22  | Give the source of funding and the role of the funders for the present study and, if applicable, for the original study on which the present article is based                                                | 13    |

**STROBE 2007 (v4) Statement—Checklist of items that should be included in reports of cohort studies**

\*Give information separately for cases and controls in case-control studies and, if applicable, for exposed and unexposed groups in cohort and cross-sectional studies.

**Note:** An Explanation and Elaboration article discusses each checklist item and gives methodological background and published examples of transparent reporting. The STROBE checklist is best used in conjunction with this article (freely available on the Web sites of PLoS Medicine at <http://www.plosmedicine.org/>, Annals of Internal Medicine at <http://www.annals.org/>, and Epidemiology at <http://www.epidem.com/>). Information on the STROBE Initiative is available at [www.strobe-statement.org](http://www.strobe-statement.org).



**Reoperation after oesophageal cancer surgery in relation to long-term survival: a population-based cohort study**

|                                 |                                                                                                                                                                                                                                                                                                                                                                                                                                                                                                                                                                                                                                                                                                                                                                                                 |
|---------------------------------|-------------------------------------------------------------------------------------------------------------------------------------------------------------------------------------------------------------------------------------------------------------------------------------------------------------------------------------------------------------------------------------------------------------------------------------------------------------------------------------------------------------------------------------------------------------------------------------------------------------------------------------------------------------------------------------------------------------------------------------------------------------------------------------------------|
| Journal:                        | <i>BMJ Open</i>                                                                                                                                                                                                                                                                                                                                                                                                                                                                                                                                                                                                                                                                                                                                                                                 |
| Manuscript ID:                  | bmjopen-2013-004648.R1                                                                                                                                                                                                                                                                                                                                                                                                                                                                                                                                                                                                                                                                                                                                                                          |
| Article Type:                   | Research                                                                                                                                                                                                                                                                                                                                                                                                                                                                                                                                                                                                                                                                                                                                                                                        |
| Date Submitted by the Author:   | 14-Feb-2014                                                                                                                                                                                                                                                                                                                                                                                                                                                                                                                                                                                                                                                                                                                                                                                     |
| Complete List of Authors:       | van der Schaaf, Maartje; Karolinska Institutet, Department of Molecular Medicine and Surgery<br>Derogar, Maryam; Karolinska Institutet, Department of Molecular Medicine and Surgery<br>Johar, Asif; Karolinska Institutet, Department of Molecular Medicine and Surgery<br>Rutegård, Martin; Karolinska Institutet, Department of Molecular Medicine and Surgery<br>Gossage, James; St. Thomas' Hospital, London, Department of Surgery<br>Mason, Robert; St. Thomas' Hospital, London, Department of Surgery<br>Lagergren, Pernilla; Karolinska Institute, Department of Molecular Medicine and Surgery<br>Lagargren, Jesper; KAROLINSKA INSTITUTET, Unit of Upper Gastrointestinal Research. Department of Molecular Medicine and Surgery; King's College London, Division of Cancer Studies |
| <b>Primary Subject Heading</b>: | Surgery                                                                                                                                                                                                                                                                                                                                                                                                                                                                                                                                                                                                                                                                                                                                                                                         |
| Secondary Subject Heading:      | Oncology, Gastroenterology and hepatology                                                                                                                                                                                                                                                                                                                                                                                                                                                                                                                                                                                                                                                                                                                                                       |
| Keywords:                       | Gastrointestinal tumours < GASTROENTEROLOGY, Oesophageal disease < GASTROENTEROLOGY, SURGERY, Adverse events < THERAPEUTICS                                                                                                                                                                                                                                                                                                                                                                                                                                                                                                                                                                                                                                                                     |
|                                 |                                                                                                                                                                                                                                                                                                                                                                                                                                                                                                                                                                                                                                                                                                                                                                                                 |

SCHOLARONE™  
Manuscripts



1  
2  
3  
4  
5  
6  
7  
8  
9  
10  
11  
12  
13  
14  
15  
16  
17  
18  
19  
20  
21  
22  
23  
24  
25  
26  
27  
28  
29  
30  
31  
32  
33  
34  
35  
36  
37  
38  
39  
40  
41  
42  
43  
44  
45  
46  
47  
48  
49  
50  
51  
52  
53  
54  
55  
56  
57  
58  
59  
60

## Reoperation after oesophageal cancer surgery in relation to long-term survival: a population-based cohort study

**Authors:** Maartje van der Schaaf<sup>1</sup>, Maryam Derogar<sup>1</sup>, Asif Johar<sup>1</sup>, Martin Rutegård<sup>1</sup>, James Gossage<sup>2</sup>, Robert M. Mason<sup>2</sup>, Pernilla Lagergren<sup>1</sup>, and Jesper Lagergren<sup>1, 2, 3</sup>

**Affiliations:** <sup>1</sup>Department of Molecular Medicine and Surgery, Karolinska Institutet, Stockholm, Sweden. <sup>2</sup> Department of Surgery, St. Thomas' Hospital, London, United Kingdom. <sup>3</sup> Division of Cancer Studies, King's College London, London, United Kingdom.

**Corresponding author:**

Maartje van der Schaaf

Address: Department of Molecular Medicine and Surgery, Karolinska Institutet.

Norra Stationsgatan 67, level 2, SE-171 76 Stockholm, Sweden.

Telephone: +46 (0)8-517 70983

Fax: +46 (0)8-517 76280

E-mail: maartje.van.der.schaaf@ki.se

**Key words:** Oesophageal neoplasm; oesophageal resection; oesophagectomy; complication; long-term outcome; population-based, cohort

**Word count: 2935**

## ABSTRACT

**Objectives:** The influence of reoperation on longer-term prognosis is unknown. In this large population-based cohort study it was aimed to investigate the influence of a reoperation within 30 days of oesophageal cancer resection, on survival even after excluding the initial postoperative period.

**Design:** This was a nation-wide population-based retrospective cohort study

**Setting:** All hospitals performing oesophageal cancer resections during the study period (1987-2010) in Sweden

**Participants:** Patients operated for oesophageal cancer with curative intent in 1987-2010

**Primary and secondary outcomes:** Adjusted hazard ratio's (HR) of all cause, early- and late mortality up to 5-years after reoperation following oesophageal cancer resection.

**Results:** Among 1822 included patients, the 200 (11%) who were reoperated had a 27% increased HR of all-cause mortality (adjusted HR 1.27, 95% CI 1.05-1.53) and 28% increased HR of disease-specific mortality (adjusted HR 1.28, 95% CI 1.04-1.59), compared to those not reoperated. Reoperation for anastomotic insufficiency in particular was followed by an increased mortality (adjusted HR 1.82, 95% CI 1.19-2.76).

**Conclusion:** This large and population-based nationwide cohort study shows that reoperation within 30 days after primary oesophageal resection was

1  
2  
3 associated with a increased mortality, even after excluding the initial 3 months  
4  
5 after surgery. This finding stresses the need to consider any actions that  
6  
7 might prevent complications and reoperation after oesophageal cancer  
8  
9 resection.  
10  
11  
12  
13  
14  
15  
16  
17  
18  
19  
20  
21  
22  
23  
24  
25  
26  
27  
28  
29  
30  
31  
32  
33  
34  
35  
36  
37  
38  
39  
40  
41  
42  
43  
44  
45  
46  
47  
48  
49  
50  
51  
52  
53  
54  
55  
56  
57  
58  
59  
60

For peer review only

## STRENGTH AND LIMITATIONS OF THE STUDY

- The study had a population-based cohort design
- It was possible to adjust for several confounding factors through comprehensive data collection from medical records and registries
- Data on complications other than reoperation were missing
- The retrospective design was a limitation

## INTRODUCTION

Despite recent developments in multimodal therapy, surgical tumour resection is still the mainstay of treatment for localized oesophageal cancer[1]. While postoperative mortality has decreased to less than 5% in recent years[2], oesophageal resection still carries a considerable risk for post-operative complications, some of which require reoperation[1 3 4]. Major postoperative complications are known to negatively influence short-term survival[2], but evidence of the influence of such complications on long-term survival is inconsistent[5-8]. A recent study from our group suggested that surgical complications after oesophageal cancer resection might be an independent predictor for a poorer long-term survival[9]. Any potential effect of reoperation in lowering long-term survival after oesophagectomy could be mediated by several biological mechanisms, e.g. the additional surgical trauma could further trigger an inflammatory response that could lower the efficacy of bodily defence mechanisms, including destruction and removal of circulating tumour cells, and thus pave the way for early recurrence [10], and the major surgical complications that cause the need for reoperation might directly facilitate tumour recurrence, e.g. anastomotic insufficiency might entail direct tumour spread [9 11]. Therefore, we hypothesised that reoperation within 30 days after initial oesophageal resection negatively influences long-term survival.

## METHODS

### Study design

This was a retrospective population-based cohort study. The study cohort has previously been presented in detail [12 13]. All patients having undergone oesophagectomy for oesophageal cancer during the period 1987-2010 in Sweden were included in the study. Eligible patients were followed up until death or end of the study (28<sup>th</sup> February 2012), whichever occurred first.

### Study population

Oesophageal cancer patients were identified from the Swedish Cancer Registry, a registry with 98% nationwide coverage of oesophageal cancer patients[14 15]. Tumours of the gastric cardia were not included. Oesophageal cancer was defined by the diagnosis code 150.0, 150.8, and 150.9 in the 7<sup>th</sup> version of the International Classification of Diseases (ICD7). The identified patients were linked with the Swedish Patient Registry to include only those who underwent oesophageal resection in the final study cohort. Our group has recently reported that the Patient Registry has a positive predictive value of 99.6% for assessing oesophageal cancer resection[16]. Detailed information on tumour characteristics and surgical details were acquired through manual scrutiny of medical records from the operation charts and histopathology reports, with accompanying referral notes, retrieved from all relevant hospitals throughout Sweden [12 13]. One reviewer, who was kept blinded for the study outcome to ensure objectivity, reviewed all histopathological reports according to a predefined protocol to ensure uniformity. The accuracy of the histopathological review was assessed by two

1  
2  
3 researchers who independently reviewed 100 patient records, showing high  
4 accuracy (>90% concordance).[13] The Patient Registry was used to obtain  
5 information on reoperations after the primary oesophageal resection and on  
6 comorbidities. Detailed information about indications for reoperation was not  
7 available. To calculate survival time after oesophagectomy, dates of death  
8 were collected from the Swedish Causes of Death Registry. This register is  
9 complete and is updated continuously facilitating availability of accurate dates  
10 of death. The unique 10-digit Swedish personal identity number, assigned to  
11 every resident in Sweden since 1947[17], was used for linkage of individuals  
12 between registries and for identification of the patients' hospital records.  
13  
14  
15  
16  
17  
18  
19  
20  
21  
22  
23  
24  
25  
26

### 27 **Study exposure and outcome**

28  
29 The exposure was defined as any open or minimally invasive reoperation  
30 within 30 days of initial oesophageal cancer resection. Exposure was defined  
31 according to the Classification of Surgical Procedures. More specifically,  
32 reoperation was categorised as: 1) Explorative laparotomy (ICD10 JAH00,  
33 JAK00), 2) explorative thoracotomy (ICD10 GAB13, GAB96, GAB10), 3)  
34 reoperation for bleeding (ICD10 JWE00, GWE00), 4) reoperation for  
35 anastomotic insufficiency (ICD10 JWF00, GWF00, DWF00, 5) reoperation for  
36 wound revision (ICD10 JWA00), or 6) reoperation for deep infection (ICD10  
37 GWC00, GCW01, JWC00) (Table1).  
38  
39  
40  
41  
42  
43  
44  
45  
46  
47  
48

49 The study outcomes were was all-cause early-, late- and disease-specific  
50 mortality. "Early postoperative mortality" was defined as any death occurring  
51 within 90 days of initial surgery, while "late mortality" was defined as any  
52 death between 90 days and 5 years of the primary resection. "Disease  
53  
54  
55  
56  
57  
58  
59  
60

1  
2  
3 specific mortality” was defined as death of tumour recurrence occurring  
4  
5 between 90-days and 5 years of surgery. If a cause of death included  
6  
7 oesophageal cancer (diagnosis codes 150 according to ICD7) in the Swedish  
8  
9 Causes of Death Registry, we assumed that patients died of tumour  
10  
11 recurrence. We also analysed the impact of each of the most common types  
12  
13 of reoperations on mortality between 90 days and 5-years of surgery in  
14  
15 subgroup analyses. Since tumour recurrence is a less likely explanation for  
16  
17 mortality 5 years and later after oesophageal cancer surgery, we decided to  
18  
19 use 5 years as cut-off. The Regional Ethical Review Board in Stockholm,  
20  
21 Sweden approved the study.  
22  
23  
24  
25  
26

### 27 **Statistical analysis**

28  
29 Survival was calculated using the Kaplan-Meier method, and differences in  
30  
31 survival between the survival curves of patients with and without reoperation  
32  
33 were evaluated using the log rank test. In a Cox proportional hazards  
34  
35 regression model, hazard ratios (HR's) with 95% confidence intervals (CI's)  
36  
37 were calculated, including adjustment for potential confounding factors in a  
38  
39 multivariable model. In the Cox model the proportionality assumption was  
40  
41 tested. The factors adjusted for were nine known prognostic factors. They  
42  
43 were categorised as follows: 1) age (categorised into three groups: <65, 65-75,  
44  
45 or >75 years), 2) sex, 3) comorbidity (including any of: hypertension, ischemic  
46  
47 heart disease, cardiac failure, chronic obstructive pulmonary disease, asthma,  
48  
49 diabetes, former cancer diagnosis, human immunodeficiency virus, liver  
50  
51 disease and renal disease; and categorised into three groups: none, one, or  
52  
53 two or more), 4) tumour stage (classified according to the 6<sup>th</sup> version of the  
54  
55  
56  
57  
58  
59  
60



1  
2  
3 Union for International Cancer Control -TNM classification; and categorised  
4  
5 into four groups: 0-I, II, III, or IV), 5) histological type of tumour (categorised  
6  
7 into two groups: squamous cell carcinoma or adenocarcinoma), 6)  
8  
9 neoadjuvant therapy (yes or no) data on the type of neo-adjuvant therapy  
10  
11 used, i.e. chemoradiotherapy or chemotherapy, was not available, but in  
12  
13 Sweden, the use of chemoradiotherapy has dominated whenever neo-  
14  
15 adjuvant therapy has been used, 7) surgical radicality (R0 or not R0), 8)  
16  
17 surgeon volume (<9 or ≥9 per year) To avoid selecting a suitable cut-off for  
18  
19 surgeon annual volume, we simply chose to use the median as the cut-off,  
20  
21 and 9) calendar period (1987-1996 or 1996-2005). We also considered lymph  
22  
23 node harvest as a potential confounder, but this variable did not significantly  
24  
25 influence the results (Chi-square p-value 0.687), and since there was a  
26  
27 substantial rate of missing data on lymph node harvest, we decided not to  
28  
29 include this variable in the final multivariable model. Information on  
30  
31 comorbidities was obtained from the Swedish Patient Register, information on  
32  
33 tumour stage and histological type of tumour, surgical radicality and neo-  
34  
35 adjuvant treatment was extracted from histopathological records and  
36  
37 accompanying referral notes. [16] Missing values in the covariates were  
38  
39 treated as a separate group in the Cox regression model[18]. A sensitivity  
40  
41 analysis was performed to compare the impact of categorising missing as a  
42  
43 separate group against removing these missing values from the analysis.  
44  
45  
46  
47  
48 All statistical analyses were done using STATA 11 for Mac (STATAcorp  
49  
50 College Station, Texas).  
51  
52  
53  
54  
55  
56  
57  
58  
59  
60

## RESULTS

### Patients

Some 2195 patients were identified as eligible in the study cohort of oesophageal cancer patients who underwent resection in Sweden during the study period. After exclusion of 373 patients (17%) where medical records were not available or where exposure data were missing, 1822 (83%) patients remained for final analysis. Of these, 200 patients (11%) were exposed for reoperation (in total 248 reoperations) within 30 days of the primary oesophageal resection (Table 1).

**Table 1.** Categorisation of the 248 reoperations within 30 days after initial surgery in a cohort of 1822 patients undergoing oesophagectomy between 1987 and 2010 in Sweden, with follow-up until 28<sup>th</sup> February 2012.

| Type of reoperation                       | Number (%) |
|-------------------------------------------|------------|
| Total number of reoperations              | 248 (100)  |
| Explorative laparotomy                    | 47 (19)    |
| Explorative thoracotomy                   | 11 (4)     |
| Reoperation for bleeding                  | 22 (9)     |
| Reoperation for anastomotic insufficiency | 43 (17)    |
| Laparotomy                                | 3          |
| Thoracotomy                               | 1          |
| Unknown/other                             | 39         |
| Reoperation for infection                 | 8 (3)      |
| Reoperation for wound revision            | 50 (20)    |
| Wound revision for bleeding               | 15         |
| Wound revision for infection              | 5          |
| Wound dehiscence                          | 7          |
| Unknown                                   | 23         |
| Other reoperations                        | 75 (30)    |

1  
2  
3 There were no major differences between the groups with and without  
4 reoperation regarding the distribution of sex, age, comorbidity, tumour stage,  
5 tumour histology, neo-adjuvant therapy, hospital volume, or calendar period  
6 (Table 2). Among the 1484 patients who died during the entire study period,  
7 1246 (84%) had documented tumour recurrence, which means that the all-  
8 cause mortality within 5 years closely mirrors disease-specific mortality. There  
9 were no missing values for reoperation (exposure) and missing values in  
10 covariates were missing at random. A sensitivity analysis was performed to  
11 compare the impact of categorising missing as a separate group against  
12 removing these missing values from the analysis, and the results were similar  
13 (data not shown). In the Cox model the proportionality assumption was tested  
14 and the model satisfied the assumption.  
15  
16  
17  
18  
19  
20  
21  
22  
23  
24  
25  
26  
27  
28  
29  
30  
31  
32  
33  
34  
35  
36  
37  
38  
39  
40  
41  
42  
43  
44  
45  
46  
47  
48  
49  
50  
51  
52  
53  
54  
55  
56  
57  
58  
59  
60

**Table 2.** Characteristics of 1822 patients undergoing oesophagectomy between 1987 and 2010 in Sweden, with follow-up until 28<sup>th</sup> February 2012

| Characteristics            | Number (%)     |             | P-value <sup>§</sup> |
|----------------------------|----------------|-------------|----------------------|
|                            | No reoperation | Reoperation |                      |
| <b>Total</b>               | 1622 (89)      | 200 (11)    |                      |
| <b>Sex</b>                 |                |             |                      |
| Men                        | 1211 (75)      | 151 (75)    | 0.8                  |
| Women                      | 411 (25)       | 49 (25)     |                      |
| <b>Age</b>                 |                |             |                      |
| ≤64                        | 754 (46)       | 93 (47)     | 0.9                  |
| 65-75                      | 615 (38)       | 78 (39)     |                      |
| >75                        | 253 (16)       | 29 (14)     |                      |
| <b>Comorbidity*</b>        |                |             |                      |
| None                       | 832 (51)       | 107 (54)    | 0.8                  |
| 1                          | 542 (34)       | 63 (31)     |                      |
| ≥2                         | 248 (15)       | 30 (15)     |                      |
| <b>Stage‡</b>              |                |             |                      |
| 0-I                        | 339 (20)       | 41 (20)     | 0.9                  |
| II                         | 532(33)        | 71 (35)     |                      |
| III                        | 399 (25)       | 46 (23)     |                      |
| IV                         | 127(8)         | 13 (7)      |                      |
| Missing <sup>†</sup>       | 225 (14)       | 29 (15)     |                      |
| <b>Histology</b>           |                |             |                      |
| Adenocarcinoma             | 645 (40)       | 70 (35)     | 0.09                 |
| Squamous cell carcinoma    | 880 (54)       | 123 (62)    |                      |
| Missing <sup>†</sup>       | 97 (6)         | 7 (3)       |                      |
| <b>Neoadjuvant therapy</b> |                |             |                      |
| None                       | 677 (42)       | 85 (43)     | 0.4                  |
| Radiotherapy               | 154 (9)        | 26 (13)     |                      |
| Chemoradiotherapy          | 302 (19)       | 35 (17)     |                      |
| Missing <sup>†</sup>       | 489 (30)       | 54 (27)     |                      |
| <b>Radicality</b>          |                |             |                      |
| R0                         | 1135 (69)      | 137 (68)    | 0.7                  |
| Not R0                     | 251 (16)       | 30 (15)     |                      |
| Missing <sup>†</sup>       | 236 (15)       | 33 (17)     |                      |
| <b>Surgeon volume</b>      |                |             |                      |
| <9 per year                | 875 (54)       | 122 (61)    | 0.06                 |
| ≥9 per year                | 747 (46)       | 78 (39)     |                      |
| <b>Calendar period</b>     |                |             |                      |
| 1987-1990                  | 234 (14)       | 34 (17)     | 0.2                  |
| 1991-1994                  | 302 (19)       | 43 (22)     |                      |
| 1995-1999                  | 330 (20)       | 49 (25)     |                      |
| 2000-2005                  | 382(24)        | 37 (19)     |                      |
| 2006-2010                  | 374 (23)       | 37 (19)     |                      |

1  
2  
3 \*Comorbidity included: hypertension, ischemic heart disease, cardiac failure, chronic  
4 obstructive pulmonary disease, asthma, diabetes, former cancer diagnosis, human  
5 immunodeficiency virus, liver disease, and renal disease.

6  
7 † Missing values of covariates were missing at random and considered as a separate  
8 group.

9  
10 ‡Categorised according to the 6<sup>th</sup> version of the Union for International Cancer  
11 Control (UICC)-TNM classification.

12  
13 §Chi-square of the difference between groups  
14  
15  
16  
17  
18  
19  
20  
21  
22  
23  
24  
25  
26  
27  
28  
29  
30  
31  
32  
33  
34  
35  
36  
37  
38  
39  
40  
41  
42  
43  
44  
45  
46  
47  
48  
49  
50  
51  
52  
53  
54  
55  
56  
57  
58  
59  
60

For peer review only

### Reoperation and risk of mortality

Among the 208 patients (11%) who died within 90 days of surgery, 54 (26%) underwent reoperation. Reoperation was a risk factor for 90-day mortality after adjustment for confounding factors (HR 3.05, 95% CI 2.22-4.17). Among the 1276 (79%) patients who died between 90 days and 5 years after surgery 117 (10%) were reoperated. Among the 122 who died after 5 years of surgery 5 (4%) were reoperated. The log-rank test comparing the Kaplan-Meier survival curves of patients with and without reoperation between 90 days and 5 years after surgery revealed a statistically significantly increased mortality in the reoperated group ( $p < 0.0001$ ) (Figure 1, Table 3).

**Table 3.** Hazard ratios (HR) with 95% confidence intervals (95% CI) of mortality after oesophagectomy with respect to occurrence of reoperation, based on 1822 patients undergoing oesophageal cancer surgery in 1987-2012 in Sweden

| Reoperation                         | Number of patients (%) | Number of events (%) <sup>‡</sup> | HR (95% CI)      |
|-------------------------------------|------------------------|-----------------------------------|------------------|
| <b>All stages</b>                   |                        |                                   |                  |
| <90 days                            | 1822 (100)             | 208 (11)                          |                  |
| Crude                               |                        |                                   | 3.17 (2.32-4.32) |
| Multivariable* <sup>†</sup>         |                        |                                   | 3.05 (2.22-4.17) |
| ≥90 days – 5 years                  | 1614 (89)              | 1276 (79)                         |                  |
| Crude                               |                        |                                   | 1.22 (1.02-1.47) |
| Multivariable* <sup>†</sup>         |                        |                                   | 1.27 (1.05-1.53) |
| ≥90 days – 5 years disease specific | 1292 (71)              | 954 (74)                          |                  |
| Crude                               |                        |                                   | 1.26 (1.03-1.57) |
| Multivariable* <sup>†</sup>         |                        |                                   | 1.28 (1.04-1.59) |

\*Adjusted for sex, age, co-morbidities, tumour stage, histology, neoadjuvant therapy, radicality, surgeon volume, and calendar period.

<sup>†</sup>Missing values of covariates were missing at random and considered as a separate group.

<sup>‡</sup>Event means death

As presented in Table 3, there was a 27% increased hazard of mortality during the period 90 days to 5 years after surgery after adjustment for all nine potential confounding factors (crude HR 1.22, adjusted HR 1.27, 95% CI 1.05-1.53) (Table 3). During the follow-up period, 954 (74%) patients died of reported tumour recurrence. The disease-specific mortality within 90 days and 5 years of surgery was 28% increased among patients who were reoperated (adjusted HR 1.28, 95% CI 1.04-1.59) (Table 3). The proportional hazard assumption, tested using a non-zero slope, and time varying covariates were satisfied, and there were no statistically significant interaction effects with reoperation (data not shown).

#### Reoperation and risk of mortality- subgroup analyses of most common reoperations

In a subgroup analysis of the 3 most common types of reoperations, i.e. exploratory laparotomy, reoperation for anastomotic insufficiency and wound revision, the point HRs were increased for each type of reoperation (Table 4), and patients reoperated for anastomotic insufficiency in particular had a statistically significantly increased hazard of mortality (adjusted HR 1.82, 95% CI 1.19-2.76).

**Table 4.** Hazard ratios (HR) with 95% confidence intervals (95% CI) of mortality between 90 days and 5-years in a subgroup analyses of the most common types of reoperations after oesophagectomy, based on 1822 patients undergoing oesophageal cancer surgery in 1987-2012 in Sweden

| Type of reoperation | Number of patients (%) | HR (95% CI) <sup>*,†</sup> |
|---------------------|------------------------|----------------------------|
|---------------------|------------------------|----------------------------|

|                                           |         |                  |
|-------------------------------------------|---------|------------------|
| Exploratory laparotomy                    | 47 (19) | 1.17 (0.82-1.67) |
| Reoperation for anastomotic insufficiency | 43 (17) | 1.82 (1.19-2.76) |
| Wound revision                            | 50 (20) | 1.32 (0.87-2.00) |

Adjusted for sex, age, co-morbidities, tumour stage, histology, neoadjuvant therapy, radicality, surgeon volume, and calendar period.

†Missing values of covariates were missing at random and considered as a separate group.

For peer review only



## DISCUSSION

This is, to the best of our knowledge, the first study addressing reoperation in relation to late mortality after primary oesophageal cancer resection, and it revealed an increased long-term all-cause and disease-specific mortality in patients that underwent reoperation compared to those who did not. Patients that were reoperation due to anastomotic insufficiency experienced a particularly high hazard of mortality.

Among strengths of this study is the population-based design, where most patients who underwent oesophageal cancer surgery in Sweden during 1987-2010 were included. The follow-up for mortality was complete by virtue of the availability of personal identity numbers for Swedish residents, together with the fully complete Swedish Causes of Death Registry. Another major strength is the possibility to adjust for several known prognostic factors, which reduces the risk of confounding. Moreover, the exposure and outcome were predefined, which reduces the risk of chance findings and decreases the risk of systematic errors owing to misclassification. Some limitations of the study require a discussion. The retrospective clinical data collection imposes a risk of misclassification and selection bias. The researchers involved in gathering the clinical information had, however, no link with the participating hospitals and were not involved in the patient care, which decreases these risks. A risk of residual confounding by known prognostic factors or confounding by unknown factors cannot be excluded in observational research due to the lack of randomization. There was for example no access to information on pre-operative performance status and nutritional status, which might have influenced the results[19]. Another limitation was the lack of information on

1  
2  
3 complications, and thus the indication for the reoperations. Although the long  
4  
5 study period offered good statistical power, it also entailed a risk of bias by  
6  
7 changes in surgical techniques and standards in patients care over time. To  
8  
9 counteract such effects, we adjusted all HRs for calendar period. The limited  
10  
11 rate of exposure to reoperation still meant that the exposure could not be  
12  
13 further subcategorised because of power issues. Finally, the use of a cut-off  
14  
15 of 30 days of surgery for assessing re-operation might result in missing of  
16  
17 later re-operations. However, we decided before the study was initiated to use  
18  
19 a cut-off that was likely to be directly associated with the oesophagectomy,  
20  
21 but yet not too short. Since there is no agreed upon cut-off for capturing early  
22  
23 reoperations associated with surgery, we instead use a commonly used cut-  
24  
25 off for short-term mortality, which is traditionally 30 days.  
26  
27  
28

29  
30 The finding of the prognostic role of reoperations after excluding the initial  
31  
32 postoperative period is a novel finding that should encourage further research.  
33  
34 It stresses the need for preventive measures to reduce the need for  
35  
36 reoperation. In this population the 3 most common performed types of  
37  
38 reoperation were explorative laparotomy (19%), re-operation for anastomotic  
39  
40 leak (17%) and wound revision (20%). The results of the subgroup analyses  
41  
42 showed that especially patients undergoing reoperation for anastomotic  
43  
44 insufficiency had an increased risk of mortality. There is some evidence that  
45  
46 anastomotic insufficiency entails direct tumour spread and seeding of  
47  
48 remaining viable tumour cells in colon cancer patients[11 20]. This might  
49  
50 explain the higher mortality in patients with reoperation for anastomotic  
51  
52 insufficiency.  
53  
54  
55  
56  
57  
58  
59  
60

1  
2  
3 Several studies have showed that a higher surgeon or hospital volume  
4 reduces post-operative mortality and morbidity. [12 21-24] High volume  
5 surgery is facilitated by centralisation of the care for oesophageal cancer  
6 patients. Centralisation might be an effective measure for prevention of  
7 severe post-operative complications. A recent study showed that patients with  
8 comorbidity that compromises the cardiovascular status leading to a  
9 compromised perfusion of organs (e.g. hypertension, diabetes, congestive  
10 heart failure and renal failure), have a higher risk of anastomotic leak. This  
11 finding indicates that pre-operative optimisation of the cardiovascular status  
12 might also decrease the risk of severe complications requiring  
13 reoperation.[25] No previous studies have, to the best of our knowledge,  
14 addressed the influence of reoperations on long-term survival in oesophageal  
15 cancer patient. However, the main indication for reoperation is the occurrence  
16 of severe postoperative complications, and a few previous studies have  
17 assessed the role of such complications on long-term survival. These have  
18 provided conflicting results; some studies have reported a worse longer-term  
19 prognosis after surgical complications[7 9], medical complications[10], or  
20 concurrent surgical and medical complication[4], while others have not found  
21 any such effect[6 8]. These differences might be due to differences in  
22 classification of the severity of the complications and missing information on  
23 interventions.

24  
25  
26  
27  
28  
29  
30  
31  
32  
33  
34  
35  
36  
37  
38  
39  
40  
41  
42  
43  
44  
45  
46  
47  
48  
49  
50  
51 One biological mechanism that might explain the decreased long-term  
52 survival after reoperation is that the additional surgical injury reduces the  
53 protection against seeding of tumour cells, including activation of natural killer  
54 cells and other anti-carcinogenic factors[26]. Furthermore, it is possible that  
55  
56  
57  
58  
59  
60

1  
2  
3 additional surgery triggers an elevated inflammatory response that might in  
4  
5 turn stimulate growth of micro-tumours and induce tumour recurrence and  
6  
7 death from recurrence[10]. Another potential mechanism considers certain  
8  
9 complications. Finally, blood transfusion has been linked with a worse long-  
10  
11 term mortality and increased cancer recurrence in different types of cancer  
12  
13 [27-30]. Unfortunately, we did not have information on blood transfusion in this  
14  
15 study, but it can be assumed that patients returning to theatre are more likely  
16  
17 to receive blood transfusion, and speculatively, blood transfusion may be a  
18  
19 mechanism that contributes to the main finding of this study.  
20  
21  
22

23  
24 In conclusion, this nationwide and population-based cohort study with  
25  
26 adjustment for several potential confounding factors indicates that reoperation  
27  
28 is associated with an increased hazard of mortality even after the initial 3  
29  
30 months of the oesophageal cancer resection. This finding warrants more  
31  
32 research, but further stresses the need to consider any actions that might  
33  
34 prevent complications requiring reoperation after the primary surgery in  
35  
36 oesophageal cancer patients.  
37  
38  
39  
40  
41  
42  
43  
44  
45  
46  
47  
48  
49  
50  
51  
52  
53  
54  
55  
56  
57  
58  
59  
60

**Figure legend:**

**Figure 1.** Kaplan-Meier survival curve for survival between 90 days and 5 years with respect to occurrence of reoperation among 1614 patients undergoing oesophageal cancer surgery in 1987-2010 in Sweden.

**Funding:** This study was funded by the Swedish Cancer Society and the Swedish Research Council. No conflicts of interest were reported.

**Authors' individual contribution:**

Dr M. van der Schaaf and J. Lagergren, had full access to all of the data in the study and take responsibility for the integrity of the data and the accuracy of the data analysis. **Study concept and design:** M. van der Schaaf, J.

Lagergren, P. Lagergren, M. Rutegård, M. Derogar. **Acquisition of data:** P.

Lagergren, J. Lagergren, M. van der Schaaf, M. Derogar. **Analysis and**

**interpretation of data:** M. van der Schaaf, J. Lagergren, A. Johar. **Drafting**

**of the manuscript:** M. van der Schaaf, J. Lagergren. **Critical revision of the**

**manuscript for important intellectual content:** J. Gossage, R. Mason, M.

Rutegård, P. Lagergren. **Statistical analysis:** A. Johar, M. Derogar.

**Obtained funding:** J. Lagergren, P. Lagergren.

**Data sharing:**

“Statistical codes and dataset are available from the primary investigator

Jesper Lagergren (jesper.lagergren@ki.se), at Upper GI Research Group,

Department of Molecular Medicine and Surgery, Karolinska Institutet,

Stockholm Sweden, who will provide a permanent and citable home for the

dataset”

1  
2  
3 **Competing Interests:**  
4

5  
6 None  
7  
8  
9  
10  
11  
12  
13  
14  
15  
16  
17  
18  
19  
20  
21  
22  
23  
24  
25  
26  
27  
28  
29  
30  
31  
32  
33  
34  
35  
36  
37  
38  
39  
40  
41  
42  
43  
44  
45  
46  
47  
48  
49  
50  
51  
52  
53  
54  
55  
56  
57  
58  
59  
60

For peer review only

## REFERENCES

1. Wu PC, Posner MC. The role of surgery in the management of oesophageal cancer. *Lancet Oncol* 2003;**4**(8):481-8 doi: S1470204503011677 [pii][published Online First: Epub Date]].
2. Schieman C, Wigle DA, Deschamps C, et al. Patterns of operative mortality following esophagectomy. *Dis Esophagus* 2012 doi: 10.1111/j.1442-2050.2011.01304.x[published Online First: Epub Date]].
3. GebSKI V, Burmeister B, Smithers BM, et al. Survival benefits from neoadjuvant chemoradiotherapy or chemotherapy in oesophageal carcinoma: a meta-analysis. *Lancet Oncol* 2007;**8**(3):226-34 doi: S1470-2045(07)70039-6 [pii]  
10.1016/S1470-2045(07)70039-6 [doi][published Online First: Epub Date]].
4. Lerut T, Moons J, Coosemans W, et al. Postoperative complications after transthoracic esophagectomy for cancer of the esophagus and gastroesophageal junction are correlated with early cancer recurrence: role of systematic grading of complications using the modified Clavien classification. *Ann Surg* 2009;**250**(5):798-807 doi: 10.1097/SLA.0b013e3181bdd5a8[published Online First: Epub Date]].
5. Hirai T, Yamashita Y, Mukaida H, et al. Poor prognosis in esophageal cancer patients with postoperative complications. *Surg Today* 1998;**28**(6):576-9
6. Ferri LE, Law S, Wong KH, et al. The influence of technical complications on postoperative outcome and survival after esophagectomy. *Ann Surg Oncol* 2006;**13**(4):557-64 doi: 10.1245/ASO.2006.04.040[published Online First: Epub Date]].
7. Rizk NP, Bach PB, Schrag D, et al. The impact of complications on outcomes after resection for esophageal and gastroesophageal junction carcinoma. *J Am Coll Surg* 2004;**198**(1):42-50 doi: S1072-7515(03)00946-3 [pii]  
10.1016/j.jamcollsurg.2003.08.007[published Online First: Epub Date]].
8. Ancona E, Cagol M, Epifani M, et al. Surgical complications do not affect longterm survival after esophagectomy for carcinoma of the thoracic esophagus and cardia. *J Am Coll Surg* 2006;**203**(5):661-9 doi: S1072-7515(06)01154-9 [pii]  
10.1016/j.jamcollsurg.2006.07.017[published Online First: Epub Date]].
9. Rutegard M, Lagergren P, Rouvelas I, et al. Intrathoracic anastomotic leakage and mortality after esophageal cancer resection: a population-based study. *Ann Surg Oncol* 2012;**19**(1):99-103 doi: 10.1245/s10434-011-1926-6[published Online First: Epub Date]].
10. Lagarde SM, de Boer JD, ten Kate FJW, et al. Postoperative Complications After Esophagectomy for Adenocarcinoma of the Esophagus Are Related to Timing of Death Due to Recurrence. *Annals of Surgery* 2008;**247**(1):71-76 doi: 10.1097/SLA.0b013e31815b695e[published Online First: Epub Date]].
11. Walker KG, Bell SW, Rickard MJ, et al. Anastomotic leakage is predictive of diminished survival after potentially curative resection for colorectal cancer. *Ann Surg* 2004;**240**(2):255-9
12. Derogar M, Sadr-Azodi O, Johar A, et al. Hospital and surgeon volume in relation to survival after esophageal cancer surgery in a population-based study.

- 1  
2  
3 J Clin Oncol 2013;**31**(5):551-7 doi: 10.1200/jco.2012.46.1517[published Online  
4 First: Epub Date]].
- 5 13. Rouvelas I, Zeng W, Lindblad M, et al. Survival after surgery for oesophageal  
6 cancer: a population-based study. *Lancet Oncol* 2005;**6**(11):864-70 doi:  
7 10.1016/s1470-2045(05)70347-8[published Online First: Epub Date]].
- 8 14. Barlow L, Westergren K, Holmberg L, et al. The completeness of the Swedish  
9 Cancer Register: a sample survey for year 1998. *Acta Oncol* 2009;**48**(1):27-33  
10 doi: 10.1080/02841860802247664[published Online First: Epub Date]].
- 11 15. Lindblad M, Ye W, Lindgren A, Lagergren J. Disparities in the classification of  
12 esophageal and cardia adenocarcinomas and their influence on reported  
13 incidence rates. *Ann Surg* 2006;**243**(4):479-85 doi:  
14 10.1097/01.sla.0000205825.34452.43[published Online First: Epub Date]].
- 15 16. Lagergren K, Derogar M. Validation of oesophageal cancer surgery data in the  
16 Swedish Patient Registry. *Acta Oncol* 2012;**51**(1):65-8 doi:  
17 10.3109/0284186x.2011.633932[published Online First: Epub Date]].
- 18 17. Ludvigsson JF, Otterblad-Olausson P, Pettersson BU, et al. The Swedish  
19 personal identity number: possibilities and pitfalls in healthcare and medical  
20 research. *Eur J Epidemiol* 2009;**24**(11):659-67 doi: 10.1007/s10654-009-9350-  
21 y[published Online First: Epub Date]].
- 22 18. Cohen JC, P. *Applied multiple regression/correlation analysis for the behavioral*  
23 *sciences (2nd edition)*: Hillsdale, NJ: Lawrence Erlbaum., 1983.
- 24 19. Grotenhuis BA, Wijnhoven BP, Grune F, et al. Preoperative risk assessment  
25 and prevention of complications in patients with esophageal cancer. *J Surg Oncol*  
26 2010;**101**(3):270-8 doi: 10.1002/jso.21471[published Online First: Epub Date]].
- 27 20. McArdle CS, McMillan DC, Hole DJ. Impact of anastomotic leakage on long-  
28 term survival of patients undergoing curative resection for colorectal cancer. *Br J*  
29 *Surg* 2005;**92**(9):1150-4 doi: 10.1002/bjs.5054[published Online First: Epub  
30 Date]].
- 31 21. Birkmeyer JD, Siewers AE, Finlayson EV, et al. Hospital volume and surgical  
32 mortality in the United States. *N Engl J Med* 2002;**346**(15):1128-37 doi:  
33 10.1056/NEJMsa012337[published Online First: Epub Date]].
- 34 22. Birkmeyer JD, Stukel TA, Siewers AE, et al. Surgeon volume and operative  
35 mortality in the United States. *N Engl J Med* 2003;**349**(22):2117-27 doi:  
36 10.1056/NEJMsa035205[published Online First: Epub Date]].
- 37 23. Brusselaers N, Mattsson F, Lagergren J. Hospital and surgeon volume in  
38 relation to long-term survival after oesophagectomy: systematic review and  
39 meta-analysis. *Gut* 2013 doi: 10.1136/gutjnl-2013-306074[published Online  
40 First: Epub Date]].
- 41 24. Rouvelas I, Lagergren J. The impact of volume on outcomes after oesophageal  
42 cancer surgery. *ANZ J Surg* 2010;**80**(9):634-41 doi: 10.1111/j.1445-  
43 2197.2010.05406.x[published Online First: Epub Date]].
- 44 25. Kassis ES, Kosinski AS, Ross P, Jr., et al. Predictors of anastomotic leak after  
45 esophagectomy: an analysis of the society of thoracic surgeons general thoracic  
46 database. *Ann Thorac Surg* 2013;**96**(6):1919-26 doi:  
47 10.1016/j.athoracsur.2013.07.119[published Online First: Epub Date]].
- 48 26. Abramovitch R, Marikovsky M, Meir G, et al. Stimulation of tumour growth by  
49 wound-derived growth factors. *Br J Cancer* 1999;**79**(9-10):1392-8 doi:  
50 10.1038/sj.bjc.6690223[published Online First: Epub Date]].
- 51  
52  
53  
54  
55  
56  
57  
58  
59  
60



- 1  
2  
3 27. Tachibana M, Tabara H, Kotoh T, et al. Prognostic significance of  
4 perioperative blood transfusions in resectable thoracic esophageal cancer. *Am J*  
5 *Gastroenterol* 1999;**94**(3):757-65 doi: 10.1111/j.1572-  
6 0241.1999.00948.x[published Online First: Epub Date]].  
7  
8 28. Liu L, Wang Z, Jiang S, et al. Perioperative allogeneic blood transfusion is  
9 associated with worse clinical outcomes for hepatocellular carcinoma: a meta-  
10 analysis. *PLoS One* 2013;**8**(5):e64261 doi:  
11 10.1371/journal.pone.0064261[published Online First: Epub Date]].  
12 29. Uccella S, Ghezzi F, Cromi A, et al. Perioperative allogeneic blood transfusions  
13 and the risk of endometrial cancer recurrence. *Arch Gynecol Obstet*  
14 2013;**287**(5):1009-16 doi: 10.1007/s00404-012-2668-9[published Online First:  
15 Epub Date]].  
16 30. Acheson AG, Brookes MJ, Spahn DR. Effects of allogeneic red blood cell  
17 transfusions on clinical outcomes in patients undergoing colorectal cancer  
18 surgery: a systematic review and meta-analysis. *Ann Surg* 2012;**256**(2):235-44  
19 doi: 10.1097/SLA.0b013e31825b35d5[published Online First: Epub Date]].  
20  
21  
22  
23  
24  
25  
26  
27  
28  
29  
30  
31  
32  
33  
34  
35  
36  
37  
38  
39  
40  
41  
42  
43  
44  
45  
46  
47  
48  
49  
50  
51  
52  
53  
54  
55  
56  
57  
58  
59  
60

1  
2  
3  
4  
5  
6  
7  
8  
9  
10  
11  
12  
13  
14  
15  
16  
17  
18  
19  
20  
21  
22  
23  
24  
25  
26  
27  
28  
29  
30  
31  
32  
33  
34  
35  
36  
37  
38  
39  
40  
41  
42  
43  
44  
45  
46  
47  
48  
49  
50  
51  
52  
53  
54  
55  
56  
57  
58  
59  
60

## Reoperation after oesophageal cancer surgery in relation to long-term survival: a population-based cohort study

**Authors:** Maartje van der Schaaf<sup>1</sup>, Maryam Derogar<sup>1</sup>, Asif Johar<sup>1</sup>, Martin Rutegård<sup>1</sup>, James Gossage<sup>2</sup>, Robert M. Mason<sup>2</sup>, Pernilla Lagergren<sup>1</sup>, and Jesper Lagergren<sup>1, 2, 3</sup>

**Affiliations:** <sup>1</sup>Department of Molecular Medicine and Surgery, Karolinska Institutet, Stockholm, Sweden. <sup>2</sup> Department of Surgery, St. Thomas' Hospital, London, United Kingdom. <sup>3</sup> Division of Cancer Studies, King's College London, London, United Kingdom.

**Corresponding author:**

Maartje van der Schaaf

Address: Department of Molecular Medicine and Surgery, Karolinska Institutet.

Norra Stationsgatan 67, level 2, SE-171 76 Stockholm, Sweden.

Telephone: +46 (0)8-517 70983

Fax: +46 (0)8-517 76280

E-mail: maartje.van.der.schaaf@ki.se

**Key words:** Oesophageal neoplasm; oesophageal resection; oesophagectomy; complication; long-term outcome; population-based, cohort

**Word count: 2935**

**ABSTRACT**

**Objectives:** The influence of reoperation on longer-term prognosis is unknown. In this large population-based cohort study it was aimed to investigate the influence of a reoperation within 30 days of oesophageal cancer resection, on survival even after excluding the initial postoperative period.

**Design:** This was a nation-wide population-based retrospective cohort study

**Setting:** All hospitals performing oesophageal cancer resections during the study period (1987-2010) in Sweden

**Participants:** Patients operated for oesophageal cancer with curative intent in 1987-2010

**Primary and secondary outcomes:** Adjusted hazard ratio's (HR) of all cause, early- and late mortality up to 5-years after reoperation following oesophageal cancer resection.

**Results:** Among 1822 included patients, the 200 (11%) who were reoperated had a 27% increased HR of all-cause mortality (adjusted HR 1.27, 95% CI 1.05-1.53) and 28% increased HR of disease-specific mortality (adjusted HR 1.28, 95% CI 1.04-1.59), compared to those not reoperated. Reoperation for anastomotic insufficiency in particular was followed by an increased mortality (adjusted HR 1.82, 95% CI 1.19-2.76).

**Conclusion:** This large and population-based nationwide cohort study shows that reoperation within 30 days after primary oesophageal resection was

1  
2  
3 associated with a increased mortality, even after excluding the initial 3 months  
4  
5 after surgery. This finding stresses the need to consider any actions that  
6  
7 might prevent complications and reoperation after oesophageal cancer  
8  
9 resection.  
10  
11  
12  
13  
14  
15  
16  
17  
18  
19  
20  
21  
22  
23  
24  
25  
26  
27  
28  
29  
30  
31  
32  
33  
34  
35  
36  
37  
38  
39  
40  
41  
42  
43  
44  
45  
46  
47  
48  
49  
50  
51  
52  
53  
54  
55  
56  
57  
58  
59  
60

For peer review only

## STRENGTH AND LIMITATIONS OF THE STUDY

- The study had a population-based cohort design
- It was possible to adjust for several confounding factors through comprehensive data collection from medical records and registries
- Data on complications other than reoperation were missing
- The retrospective design was a limitation

## INTRODUCTION

Despite recent developments in multimodal therapy, surgical tumour resection is still the mainstay of treatment for localized oesophageal cancer[1]. While postoperative mortality has decreased to less than 5% in recent years[2], oesophageal resection still carries a considerable risk for post-operative complications, some of which require reoperation[1 3 4]. Major postoperative complications are known to negatively influence short-term survival[2], but evidence of the influence of such complications on long-term survival is inconsistent[5-8]. A recent study from our group suggested that surgical complications after oesophageal cancer resection might be an independent predictor for a poorer long-term survival[9]. Any potential effect of reoperation in lowering long-term survival after oesophagectomy could be mediated by several biological mechanisms, e.g. the additional surgical trauma could further trigger an inflammatory response that could lower the efficacy of bodily defence mechanisms, including destruction and removal of circulating tumour cells, and thus pave the way for early recurrence [10], and the major surgical complications that cause the need for reoperation might directly facilitate tumour recurrence, e.g. anastomotic insufficiency might entail direct tumour spread [9 11]. Therefore, we hypothesised that reoperation within 30 days after initial oesophageal resection negatively influences long-term survival.

## METHODS

### Study design

This was a retrospective population-based cohort study. The study cohort has previously been presented in detail [12 13]. All patients having undergone oesophagectomy for oesophageal cancer during the period 1987-2010 in Sweden were included in the study. Eligible patients were followed up until death or end of the study (28<sup>th</sup> February 2012), whichever occurred first.

### Study population

Oesophageal cancer patients were identified from the Swedish Cancer Registry, a registry with 98% nationwide coverage of oesophageal cancer patients[14 15]. Tumours of the gastric cardia were not included. Oesophageal cancer was defined by the diagnosis code 150.0, 150.8, and 150.9 in the 7<sup>th</sup> version of the International Classification of Diseases (ICD7). The identified patients were linked with the Swedish Patient Registry to include only those who underwent oesophageal resection in the final study cohort. Our group has recently reported that the Patient Registry has a positive predictive value of 99.6% for assessing oesophageal cancer resection[16]. Detailed information on tumour characteristics and surgical details were acquired through manual scrutiny of medical records from the operation charts and histopathology reports, with accompanying referral notes, retrieved from all relevant hospitals throughout Sweden [12 13]. One reviewer, who was kept blinded for the study outcome to ensure objectivity, reviewed all histopathological reports according to a predefined protocol to ensure uniformity. The accuracy of the histopathological review was assessed by two

1  
2  
3 researchers who independently reviewed 100 patient records, showing high  
4 accuracy (>90% concordance).[13] The Patient Registry was used to obtain  
5 information on reoperations after the primary oesophageal resection and on  
6 comorbidities. Detailed information about indications for reoperation was not  
7 available. To calculate survival time after oesophagectomy, dates of death  
8 were collected from the Swedish Causes of Death Registry. This register is  
9 complete and is updated continuously facilitating availability of accurate dates  
10 of death. The unique 10-digit Swedish personal identity number, assigned to  
11 every resident in Sweden since 1947[17], was used for linkage of individuals  
12 between registries and for identification of the patients' hospital records.  
13  
14  
15  
16  
17  
18  
19  
20  
21  
22  
23  
24  
25  
26  
27

### 28 **Study exposure and outcome**

29 The exposure was defined as any open or minimally invasive reoperation  
30 within 30 days of initial oesophageal cancer resection. Exposure was defined  
31 according to the Classification of Surgical Procedures. More specifically,  
32 reoperation was categorised as: 1) Explorative laparotomy (ICD10 JAH00,  
33 JAK00), 2) explorative thoracotomy (ICD10 GAB13, GAB96, GAB10), 3)  
34 reoperation for bleeding (ICD10 JWE00, GWE00), 4) reoperation for  
35 anastomotic insufficiency (ICD10 JWF00, GWF00, DWF00, 5) reoperation for  
36 wound revision (ICD10 JWA00), or 6) reoperation for deep infection (ICD10  
37 GWC00, GCW01, JWC00) (Table1).  
38  
39  
40  
41  
42  
43  
44  
45  
46  
47  
48

49 The study outcomes were was all-cause early-, late- and disease-specific  
50 mortality. "Early postoperative mortality" was defined as any death occurring  
51 within 90 days of initial surgery, while "late mortality" was defined as any  
52 death between 90 days and 5 years of the primary resection. "Disease  
53  
54  
55  
56  
57  
58  
59  
60



1  
2  
3 specific mortality” was defined as death of tumour recurrence occurring  
4  
5 between 90-days and 5 years of surgery. If a cause of death included  
6  
7 oesophageal cancer (diagnosis codes 150 according to ICD7) in the Swedish  
8  
9 Causes of Death Registry, we assumed that patients died of tumour  
10  
11 recurrence. We also analysed the impact of each of the most common types  
12  
13 of reoperations on mortality between 90 days and 5-years of surgery in  
14  
15 subgroup analyses. Since tumour recurrence is a less likely explanation for  
16  
17 mortality 5 years and later after oesophageal cancer surgery, we decided to  
18  
19 use 5 years as cut-off. The Regional Ethical Review Board in Stockholm,  
20  
21 Sweden approved the study.  
22  
23  
24  
25  
26

### 27 **Statistical analysis**

28  
29 Survival was calculated using the Kaplan-Meier method, and differences in  
30  
31 survival between the survival curves of patients with and without reoperation  
32  
33 were evaluated using the log rank test. In a Cox proportional hazards  
34  
35 regression model, hazard ratios (HR's) with 95% confidence intervals (CI's)  
36  
37 were calculated, including adjustment for potential confounding factors in a  
38  
39 multivariable model. In the Cox model the proportionality assumption was  
40  
41 tested. The factors adjusted for were nine known prognostic factors. They  
42  
43 were categorised as follows: 1) age (categorised into three groups: <65, 65-75,  
44  
45 or >75 years), 2) sex, 3) comorbidity (including any of: hypertension, ischemic  
46  
47 heart disease, cardiac failure, chronic obstructive pulmonary disease, asthma,  
48  
49 diabetes, former cancer diagnosis, human immunodeficiency virus, liver  
50  
51 disease and renal disease; and categorised into three groups: none, one, or  
52  
53 two or more), 4) tumour stage (classified according to the 6<sup>th</sup> version of the  
54  
55  
56  
57  
58  
59  
60

1  
2  
3 Union for International Cancer Control -TNM classification; and categorised  
4  
5 into four groups: 0-I, II, III, or IV), 5) histological type of tumour (categorised  
6  
7 into two groups: squamous cell carcinoma or adenocarcinoma), 6)  
8  
9 neoadjuvant therapy (yes or no) data on the type of neo-adjuvant therapy  
10  
11 used, i.e. chemoradiotherapy or chemotherapy, was not available, but in  
12  
13 Sweden, the use of chemoradiotherapy has dominated whenever neo-  
14  
15 adjuvant therapy has been used, 7) surgical radicality (R0 or not R0), 8)  
16  
17 surgeon volume (<9 or ≥9 per year) To avoid selecting a suitable cut-off for  
18  
19 surgeon annual volume, we simply chose to use the median as the cut-off,  
20  
21 and 9) calendar period (1987-1996 or 1996-2005). We also considered lymph  
22  
23 node harvest as a potential confounder, but this variable did not significantly  
24  
25 influence the results (Chi-square p-value 0.687), and since there was a  
26  
27 substantial rate of missing data on lymph node harvest, we decided not to  
28  
29 include this variable in the final multivariable model. Information on  
30  
31 comorbidities was obtained from the Swedish Patient Register, information on  
32  
33 tumour stage and histological type of tumour, surgical radicality and neo-  
34  
35 adjuvant treatment was extracted from histopathological records and  
36  
37 accompanying referral notes. [16] Missing values in the covariates were  
38  
39 treated as a separate group in the Cox regression model[18]. A sensitivity  
40  
41 analysis was performed to compare the impact of categorising missing as a  
42  
43 separate group against removing these missing values from the analysis.  
44  
45  
46  
47  
48  
49 All statistical analyses were done using STATA 11 for Mac (STATAcorp  
50  
51 College Station, Texas).  
52  
53  
54  
55  
56  
57  
58  
59  
60

## RESULTS

### Patients

Some 2195 patients were identified as eligible in the study cohort of oesophageal cancer patients who underwent resection in Sweden during the study period. After exclusion of 373 patients (17%) where medical records were not available or where exposure data were missing, 1822 (83%) patients remained for final analysis. Of these, 200 patients (11%) were exposed for reoperation (in total 248 reoperations) within 30 days of the primary oesophageal resection (Table 1).

**Table 1.** Categorisation of the 248 reoperations within 30 days after initial surgery in a cohort of 1822 patients undergoing oesophagectomy between 1987 and 2010 in Sweden, with follow-up until 28<sup>th</sup> February 2012.

| Type of reoperation                       | Number (%) |
|-------------------------------------------|------------|
| Total number of reoperations              | 248 (100)  |
| Explorative laparotomy                    | 47 (19)    |
| Explorative thoracotomy                   | 11 (4)     |
| Reoperation for bleeding                  | 22 (9)     |
| Reoperation for anastomotic insufficiency | 43 (17)    |
| Laparotomy                                | 3          |
| Thoracotomy                               | 1          |
| Unknown/other                             | 39         |
| Reoperation for infection                 | 8 (3)      |
| Reoperation for wound revision            | 50 (20)    |
| Wound revision for bleeding               | 15         |
| Wound revision for infection              | 5          |
| Wound dehiscence                          | 7          |
| Unknown                                   | 23         |
| Other reoperations                        | 75 (30)    |

1  
2  
3 There were no major differences between the groups with and without  
4 reoperation regarding the distribution of sex, age, comorbidity, tumour stage,  
5 tumour histology, neo-adjuvant therapy, hospital volume, or calendar period  
6 (Table 2). Among the 1484 patients who died during the entire study period,  
7 1246 (84%) had documented tumour recurrence, which means that the all-  
8 cause mortality within 5 years closely mirrors disease-specific mortality. There  
9 were no missing values for reoperation (exposure) and missing values in  
10 covariates were missing at random. A sensitivity analysis was performed to  
11 compare the impact of categorising missing as a separate group against  
12 removing these missing values from the analysis, and the results were similar  
13 (data not shown). In the Cox model the proportionality assumption was tested  
14 and the model satisfied the assumption.  
15  
16  
17  
18  
19  
20  
21  
22  
23  
24  
25  
26  
27  
28  
29  
30  
31  
32  
33  
34  
35  
36  
37  
38  
39  
40  
41  
42  
43  
44  
45  
46  
47  
48  
49  
50  
51  
52  
53  
54  
55  
56  
57  
58  
59  
60

**Table 2.** Characteristics of 1822 patients undergoing oesophagectomy between 1987 and 2010 in Sweden, with follow-up until 28<sup>th</sup> February 2012

| Characteristics            | Number (%)     |             | P-value <sup>§</sup> |
|----------------------------|----------------|-------------|----------------------|
|                            | No reoperation | Reoperation |                      |
| <b>Total</b>               | 1622 (89)      | 200 (11)    |                      |
| <b>Sex</b>                 |                |             |                      |
| Men                        | 1211 (75)      | 151 (75)    | 0.8                  |
| Women                      | 411 (25)       | 49 (25)     |                      |
| <b>Age</b>                 |                |             |                      |
| ≤64                        | 754 (46)       | 93 (47)     | 0.9                  |
| 65-75                      | 615 (38)       | 78 (39)     |                      |
| >75                        | 253 (16)       | 29 (14)     |                      |
| <b>Comorbidity*</b>        |                |             |                      |
| None                       | 832 (51)       | 107 (54)    | 0.8                  |
| 1                          | 542 (34)       | 63 (31)     |                      |
| ≥2                         | 248 (15)       | 30 (15)     |                      |
| <b>Stage‡</b>              |                |             |                      |
| 0-I                        | 339 (20)       | 41 (20)     | 0.9                  |
| II                         | 532(33)        | 71 (35)     |                      |
| III                        | 399 (25)       | 46 (23)     |                      |
| IV                         | 127(8)         | 13 (7)      |                      |
| Missing <sup>†</sup>       | 225 (14)       | 29 (15)     |                      |
| <b>Histology</b>           |                |             |                      |
| Adenocarcinoma             | 645 (40)       | 70 (35)     | 0.09                 |
| Squamous cell carcinoma    | 880 (54)       | 123 (62)    |                      |
| Missing <sup>†</sup>       | 97 (6)         | 7 (3)       |                      |
| <b>Neoadjuvant therapy</b> |                |             |                      |
| None                       | 677 (42)       | 85 (43)     | 0.4                  |
| Radiotherapy               | 154 (9)        | 26 (13)     |                      |
| Chemoradiotherapy          | 302 (19)       | 35 (17)     |                      |
| Missing <sup>†</sup>       | 489 (30)       | 54 (27)     |                      |
| <b>Radicality</b>          |                |             |                      |
| R0                         | 1135 (69)      | 137 (68)    | 0.7                  |
| Not R0                     | 251 (16)       | 30 (15)     |                      |
| Missing <sup>†</sup>       | 236 (15)       | 33 (17)     |                      |
| <b>Surgeon volume</b>      |                |             |                      |
| <9 per year                | 875 (54)       | 122 (61)    | 0.06                 |
| ≥9 per year                | 747 (46)       | 78 (39)     |                      |
| <b>Calendar period</b>     |                |             |                      |
| 1987-1990                  | 234 (14)       | 34 (17)     | 0.2                  |
| 1991-1994                  | 302 (19)       | 43 (22)     |                      |
| 1995-1999                  | 330 (20)       | 49 (25)     |                      |
| 2000-2005                  | 382(24)        | 37 (19)     |                      |
| 2006-2010                  | 374 (23)       | 37 (19)     |                      |

1  
2  
3 \*Comorbidity included: hypertension, ischemic heart disease, cardiac failure, chronic  
4 obstructive pulmonary disease, asthma, diabetes, former cancer diagnosis, human  
5 immunodeficiency virus, liver disease, and renal disease.

6  
7 † Missing values of covariates were missing at random and considered as a separate  
8 group.

9  
10 ‡Categorised according to the 6<sup>th</sup> version of the Union for International Cancer  
11 Control (UICC)-TNM classification.

12  
13 §Chi-square of the difference between groups  
14  
15  
16  
17  
18  
19  
20  
21  
22  
23  
24  
25  
26  
27  
28  
29  
30  
31  
32  
33  
34  
35  
36  
37  
38  
39  
40  
41  
42  
43  
44  
45  
46  
47  
48  
49  
50  
51  
52  
53  
54  
55  
56  
57  
58  
59  
60

### Reoperation and risk of mortality

Among the 208 patients (11%) who died within 90 days of surgery, 54 (26%) underwent reoperation. Reoperation was a risk factor for 90-day mortality after adjustment for confounding factors (HR 3.05, 95% CI 2.22-4.17). Among the 1276 (79%) patients who died between 90 days and 5 years after surgery 117 (10%) were reoperated. Among the 122 who died after 5 years of surgery 5 (4%) were reoperated. The log-rank test comparing the Kaplan-Meier survival curves of patients with and without reoperation between 90 days and 5 years after surgery revealed a statistically significantly increased mortality in the reoperated group ( $p < 0.0001$ ) (Figure 1, Table 3).

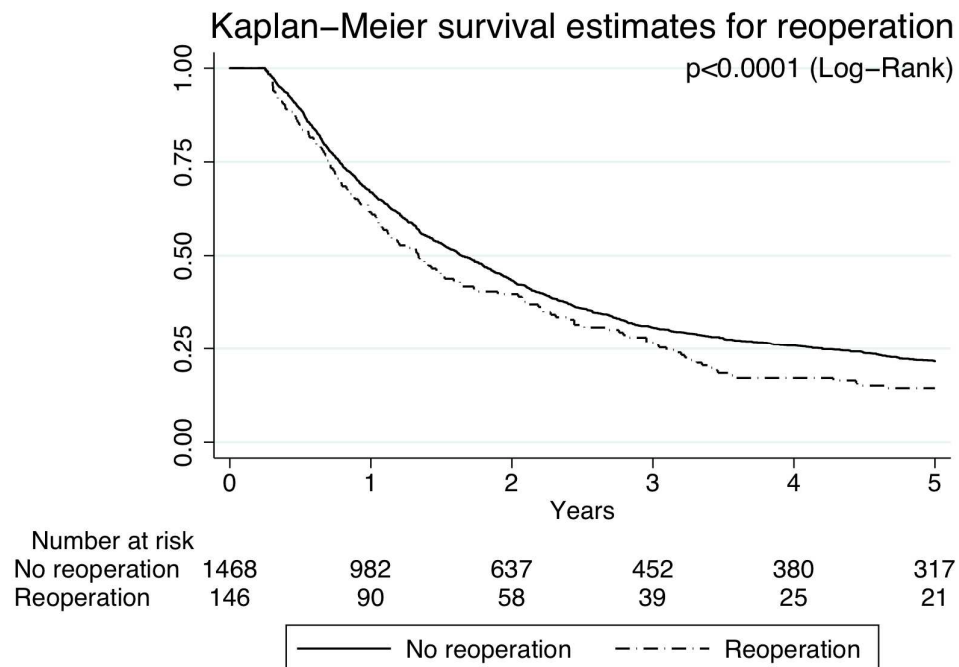

**Figure 1.** Kaplan-Meier survival curve for survival between 90 days and 5 years with respect to occurrence of reoperation among 1614 patients undergoing oesophageal cancer surgery in 1987-2010 in Sweden.

**Table 3.** Hazard ratios (HR) with 95% confidence intervals (95% CI) of mortality after oesophagectomy with respect to occurrence of reoperation, based on 1822 patients undergoing oesophageal cancer surgery in 1987-2012 in Sweden

| Reoperation                         | Number of patients (%) | Number of events (%) <sup>‡</sup> | HR (95% CI)      |
|-------------------------------------|------------------------|-----------------------------------|------------------|
| <b>All stages</b>                   |                        |                                   |                  |
| <90 days                            | 1822 (100)             | 208 (11)                          |                  |
| Crude                               |                        |                                   | 3.17 (2.32-4.32) |
| Multivariable* <sup>†</sup>         |                        |                                   | 3.05 (2.22-4.17) |
| ≥90 days – 5 years                  | 1614 (89)              | 1276 (79)                         |                  |
| Crude                               |                        |                                   | 1.22 (1.02-1.47) |
| Multivariable* <sup>†</sup>         |                        |                                   | 1.27 (1.05-1.53) |
| ≥90 days – 5 years disease specific | 1292 (71)              | 954 (74)                          |                  |
| Crude                               |                        |                                   | 1.26 (1.03-1.57) |
| Multivariable* <sup>†</sup>         |                        |                                   | 1.28 (1.04-1.59) |

\*Adjusted for sex, age, co-morbidities, tumour stage, histology, neoadjuvant therapy, radicality, surgeon volume, and calendar period.

<sup>†</sup>Missing values of covariates were missing at random and considered as a separate group.

<sup>‡</sup>Event means death

As presented in Table 3, there was a 27% increased hazard of mortality during the period 90 days to 5 years after surgery after adjustment for all nine potential confounding factors (crude HR 1.22, adjusted HR 1.27, 95% CI 1.05-1.53) (Table 3). During the follow-up period, 954 (74%) patients died of reported tumour recurrence. The disease-specific mortality within 90 days and 5 years of surgery was 28% increased among patients who were reoperated (adjusted HR 1.28, 95% CI 1.04-1.59) (Table 3). The proportional hazard assumption, tested using a non-zero slope, and time varying covariates were satisfied, and there were no statistically significant interaction effects with reoperation (data not shown).



## Reoperation and risk of mortality- subgroup analyses of most common reoperations

In a subgroup analysis of the 3 most common types of reoperations, i.e. exploratory laparotomy, reoperation for anastomotic insufficiency and wound revision, the point HRs were increased for each type of reoperation (Table 4), and patients reoperated for anastomotic insufficiency in particular had a statistically significantly increased hazard of mortality (adjusted HR 1.82, 95% CI 1.19-2.76).

**Table 4.** Hazard ratios (HR) with 95% confidence intervals (95% CI) of mortality between 90 days and 5-years in a subgroup analyses of the most common types of reoperations after oesophagectomy, based on 1822 patients undergoing oesophageal cancer surgery in 1987-2012 in Sweden

| Type of reoperation                       | Number of patients (%) | HR (95% CI) <sup>*,†</sup> |
|-------------------------------------------|------------------------|----------------------------|
| Exploratory laparotomy                    | 47 (19)                | 1.17 (0.82-1.67)           |
| Reoperation for anastomotic insufficiency | 43 (17)                | 1.82 (1.19-2.76)           |
| Wound revision                            | 50 (20)                | 1.32 (0.87-2.00)           |

Adjusted for sex, age, co-morbidities, tumour stage, histology, neoadjuvant therapy, radicality, surgeon volume, and calendar period.

<sup>†</sup>Missing values of covariates were missing at random and considered as a separate group.

## DISCUSSION

This is, to the best of our knowledge, the first study addressing reoperation in relation to late mortality after primary oesophageal cancer resection, and it revealed an increased long-term all-cause and disease-specific mortality in patients that underwent reoperation compared to those who did not. Patients that were reoperation due to anastomotic insufficiency experienced a particularly high hazard of mortality.

Among strengths of this study is the population-based design, where most patients who underwent oesophageal cancer surgery in Sweden during 1987-2010 were included. The follow-up for mortality was complete by virtue of the availability of personal identity numbers for Swedish residents, together with the fully complete Swedish Causes of Death Registry. Another major strength is the possibility to adjust for several known prognostic factors, which reduces the risk of confounding. Moreover, the exposure and outcome were predefined, which reduces the risk of chance findings and decreases the risk of systematic errors owing to misclassification. Some limitations of the study require a discussion. The retrospective clinical data collection imposes a risk of misclassification and selection bias. The researchers involved in gathering the clinical information had, however, no link with the participating hospitals and were not involved in the patient care, which decreases these risks. A risk of residual confounding by known prognostic factors or confounding by unknown factors cannot be excluded in observational research due to the lack of randomization. There was for example no access to information on pre-operative performance status and nutritional status, which might have influenced the results[19]. Another limitation was the lack of information on

1  
2  
3 complications, and thus the indication for the reoperations. Although the long  
4  
5 study period offered good statistical power, it also entailed a risk of bias by  
6  
7 changes in surgical techniques and standards in patients care over time. To  
8  
9 counteract such effects, we adjusted all HRs for calendar period. The limited  
10  
11 rate of exposure to reoperation still meant that the exposure could not be  
12  
13 further subcategorised because of power issues. Finally, the use of a cut-off  
14  
15 of 30 days of surgery for assessing re-operation might result in missing of  
16  
17 later re-operations. However, we decided before the study was initiated to use  
18  
19 a cut-off that was likely to be directly associated with the oesophagectomy,  
20  
21 but yet not too short. Since there is no agreed upon cut-off for capturing early  
22  
23 reoperations associated with surgery, we instead use a commonly used cut-  
24  
25 off for short-term mortality, which is traditionally 30 days.  
26  
27  
28

29  
30 The finding of the prognostic role of reoperations after excluding the initial  
31  
32 postoperative period is a novel finding that should encourage further research.  
33

34  
35 It stresses the need for preventive measures to reduce the need for  
36  
37 reoperation. In this population the 3 most common performed types of  
38  
39 reoperation were explorative laparotomy (19%), re-operation for anastomotic  
40  
41 leak (17%) and wound revision (20%). The results of the subgroup analyses  
42  
43 showed that especially patients undergoing reoperation for anastomotic  
44  
45 insufficiency had an increased risk of mortality. There is some evidence that  
46  
47 anastomotic insufficiency entails direct tumour spread and seeding of  
48  
49 remaining viable tumour cells in colon cancer patients[11 20]. This might  
50  
51 explain the higher mortality in patients with reoperation for anastomotic  
52  
53 insufficiency.  
54  
55  
56  
57  
58  
59  
60

1  
2  
3 Several studies have showed that a higher surgeon or hospital volume  
4 reduces post-operative mortality and morbidity. [12 21-24] High volume  
5 surgery is facilitated by centralisation of the care for oesophageal cancer  
6 patients. Centralisation might be an effective measure for prevention of  
7 severe post-operative complications. A recent study showed that patients with  
8 comorbidity that compromises the cardiovascular status leading to a  
9 compromised perfusion of organs (e.g. hypertension, diabetes, congestive  
10 heart failure and renal failure), have a higher risk of anastomotic leak. This  
11 finding indicates that pre-operative optimisation of the cardiovascular status  
12 might also decrease the risk of severe complications requiring  
13 reoperation.[25] No previous studies have, to the best of our knowledge,  
14 addressed the influence of reoperations on long-term survival in oesophageal  
15 cancer patient. However, the main indication for reoperation is the occurrence  
16 of severe postoperative complications, and a few previous studies have  
17 assessed the role of such complications on long-term survival. These have  
18 provided conflicting results; some studies have reported a worse longer-term  
19 prognosis after surgical complications[7 9], medical complications[10], or  
20 concurrent surgical and medical complication[4], while others have not found  
21 any such effect[6 8]. These differences might be due to differences in  
22 classification of the severity of the complications and missing information on  
23 interventions.

24  
25  
26  
27  
28  
29  
30  
31  
32  
33  
34  
35  
36  
37  
38  
39  
40  
41  
42  
43  
44  
45  
46  
47  
48  
49  
50  
51  
52  
53  
54  
55  
56  
57  
58  
59  
60

One biological mechanism that might explain the decreased long-term survival after reoperation is that the additional surgical injury reduces the protection against seeding of tumour cells, including activation of natural killer cells and other anti-carcinogenic factors[26]. Furthermore, it is possible that

1  
2  
3 additional surgery triggers an elevated inflammatory response that might in  
4  
5 turn stimulate growth of micro-tumours and induce tumour recurrence and  
6  
7 death from recurrence[10]. Another potential mechanism considers certain  
8  
9 complications. Finally, blood transfusion has been linked with a worse long-  
10  
11 term mortality and increased cancer recurrence in different types of cancer  
12  
13 [27-30]. Unfortunately, we did not have information on blood transfusion in this  
14  
15 study, but it can be assumed that patients returning to theatre are more likely  
16  
17 to receive blood transfusion, and speculatively, blood transfusion may be a  
18  
19 mechanism that contributes to the main finding of this study.  
20  
21

22  
23  
24 In conclusion, this nationwide and population-based cohort study with  
25  
26 adjustment for several potential confounding factors indicates that reoperation  
27  
28 is associated with an increased hazard of mortality even after the initial 3  
29  
30 months of the oesophageal cancer resection. This finding warrants more  
31  
32 research, but further stresses the need to consider any actions that might  
33  
34 prevent complications requiring reoperation after the primary surgery in  
35  
36 oesophageal cancer patients.  
37  
38  
39  
40  
41  
42  
43  
44  
45  
46  
47  
48  
49  
50  
51  
52  
53  
54  
55  
56  
57  
58  
59  
60

1  
2  
3 **Funding:** This study was funded by the Swedish Cancer Society and the  
4  
5 Swedish Research Council. No conflicts of interest were reported.  
6  
7

8 **Authors' individual contribution:**  
9

10  
11 Dr M. van der Schaaf and J. Lagergren, had full access to all of the data in the  
12  
13 study and take responsibility for the integrity of the data and the accuracy of  
14  
15 the data analysis. **Study concept and design:** M. van der Schaaf, J.  
16  
17 Lagergren, P. Lagergren, M. Rutegård, M. Derogar. **Acquisition of data:** P.  
18  
19 Lagergren, J. Lagergren, M. van der Schaaf, M. Derogar. **Analysis and**  
20  
21 **interpretation of data:** M. van der Schaaf, J. Lagergren, A. Johar. **Drafting**  
22  
23 **of the manuscript:** M. van der Schaaf, J. Lagergren. **Critical revision of the**  
24  
25 **manuscript for important intellectual content:** J. Gossage, R. Mason, M.  
26  
27 Rutegård, P. Lagergren. **Statistical analysis:** A. Johar, M. Derogar.  
28  
29  
30  
31 **Obtained funding:** J. Lagergren, P. Lagergren.  
32  
33  
34  
35  
36  
37  
38  
39  
40  
41  
42  
43  
44  
45  
46  
47  
48  
49  
50  
51  
52  
53  
54  
55  
56  
57  
58  
59  
60

## REFERENCES

1. Wu PC, Posner MC. The role of surgery in the management of oesophageal cancer. *Lancet Oncol* 2003;**4**(8):481-8 doi: S1470204503011677 [pii][published Online First: Epub Date]].
2. Schieman C, Wigle DA, Deschamps C, et al. Patterns of operative mortality following esophagectomy. *Dis Esophagus* 2012 doi: 10.1111/j.1442-2050.2011.01304.x[published Online First: Epub Date]].
3. GebSKI V, Burmeister B, Smithers BM, Foo K, Zalberg J, Simes J. Survival benefits from neoadjuvant chemoradiotherapy or chemotherapy in oesophageal carcinoma: a meta-analysis. *Lancet Oncol* 2007;**8**(3):226-34 doi: S1470-2045(07)70039-6 [pii]  
10.1016/S1470-2045(07)70039-6 [doi][published Online First: Epub Date]].
4. Lerut T, Moons J, Coosemans W, et al. Postoperative complications after transthoracic esophagectomy for cancer of the esophagus and gastroesophageal junction are correlated with early cancer recurrence: role of systematic grading of complications using the modified Clavien classification. *Ann Surg* 2009;**250**(5):798-807 doi: 10.1097/SLA.0b013e3181bdd5a8[published Online First: Epub Date]].
5. Hirai T, Yamashita Y, Mukaida H, Kuwahara M, Inoue H, Toge T. Poor prognosis in esophageal cancer patients with postoperative complications. *Surg Today* 1998;**28**(6):576-9
6. Ferri LE, Law S, Wong KH, Kwok KF, Wong J. The influence of technical complications on postoperative outcome and survival after esophagectomy. *Ann Surg Oncol* 2006;**13**(4):557-64 doi: 10.1245/ASO.2006.04.040[published Online First: Epub Date]].
7. Rizk NP, Bach PB, Schrag D, et al. The impact of complications on outcomes after resection for esophageal and gastroesophageal junction carcinoma. *J Am Coll Surg* 2004;**198**(1):42-50 doi: S1072-7515(03)00946-3 [pii]  
10.1016/j.jamcollsurg.2003.08.007[published Online First: Epub Date]].
8. Ancona E, Cagol M, Epifani M, et al. Surgical complications do not affect longterm survival after esophagectomy for carcinoma of the thoracic esophagus and cardia. *J Am Coll Surg* 2006;**203**(5):661-9 doi: S1072-7515(06)01154-9 [pii]  
10.1016/j.jamcollsurg.2006.07.017[published Online First: Epub Date]].
9. Rutegard M, Lagergren P, Rouvelas I, Lagergren J. Intrathoracic anastomotic leakage and mortality after esophageal cancer resection: a population-based study. *Ann Surg Oncol* 2012;**19**(1):99-103 doi: 10.1245/s10434-011-1926-6[published Online First: Epub Date]].
10. Lagarde SM, de Boer JD, ten Kate FJW, Busch ORC, Obertop H, van Lanschot JJB. Postoperative Complications After Esophagectomy for Adenocarcinoma of the Esophagus Are Related to Timing of Death Due to Recurrence. *Annals of Surgery* 2008;**247**(1):71-76 doi: 10.1097/SLA.0b013e31815b695e[published Online First: Epub Date]].
11. Walker KG, Bell SW, Rickard MJ, et al. Anastomotic leakage is predictive of diminished survival after potentially curative resection for colorectal cancer. *Ann Surg* 2004;**240**(2):255-9

12. Derogar M, Sadr-Azodi O, Johar A, Lagergren P, Lagergren J. Hospital and surgeon volume in relation to survival after esophageal cancer surgery in a population-based study. *J Clin Oncol* 2013;**31**(5):551-7 doi: 10.1200/jco.2012.46.1517[published Online First: Epub Date]].
13. Rouvelas I, Zeng W, Lindblad M, Viklund P, Ye W, Lagergren J. Survival after surgery for oesophageal cancer: a population-based study. *Lancet Oncol* 2005;**6**(11):864-70 doi: 10.1016/s1470-2045(05)70347-8[published Online First: Epub Date]].
14. Barlow L, Westergren K, Holmberg L, Talback M. The completeness of the Swedish Cancer Register: a sample survey for year 1998. *Acta Oncol* 2009;**48**(1):27-33 doi: 10.1080/02841860802247664[published Online First: Epub Date]].
15. Lindblad M, Ye W, Lindgren A, Lagergren J. Disparities in the classification of esophageal and cardia adenocarcinomas and their influence on reported incidence rates. *Ann Surg* 2006;**243**(4):479-85 doi: 10.1097/01.sla.0000205825.34452.43[published Online First: Epub Date]].
16. Lagergren K, Derogar M. Validation of oesophageal cancer surgery data in the Swedish Patient Registry. *Acta Oncol* 2012;**51**(1):65-8 doi: 10.3109/0284186x.2011.633932[published Online First: Epub Date]].
17. Ludvigsson JF, Otterblad-Olausson P, Pettersson BU, Ekblom A. The Swedish personal identity number: possibilities and pitfalls in healthcare and medical research. *Eur J Epidemiol* 2009;**24**(11):659-67 doi: 10.1007/s10654-009-9350-y[published Online First: Epub Date]].
18. Cohen JC, P. *Applied multiple regression/correlation analysis for the behavioral sciences (2nd edition)*: Hillsdale, NJ: Lawrence Erlbaum., 1983.
19. Grotenhuis BA, Wijnhoven BP, Grune F, van Bommel J, Tilanus HW, van Lanschot JJ. Preoperative risk assessment and prevention of complications in patients with esophageal cancer. *J Surg Oncol* 2010;**101**(3):270-8 doi: 10.1002/jso.21471[published Online First: Epub Date]].
20. McArdle CS, McMillan DC, Hole DJ. Impact of anastomotic leakage on long-term survival of patients undergoing curative resection for colorectal cancer. *Br J Surg* 2005;**92**(9):1150-4 doi: 10.1002/bjs.5054[published Online First: Epub Date]].
21. Birkmeyer JD, Siewers AE, Finlayson EV, et al. Hospital volume and surgical mortality in the United States. *N Engl J Med* 2002;**346**(15):1128-37 doi: 10.1056/NEJMsa012337[published Online First: Epub Date]].
22. Birkmeyer JD, Stukel TA, Siewers AE, Goodney PP, Wennberg DE, Lucas FL. Surgeon volume and operative mortality in the United States. *N Engl J Med* 2003;**349**(22):2117-27 doi: 10.1056/NEJMsa035205[published Online First: Epub Date]].
23. Brusselaers N, Mattsson F, Lagergren J. Hospital and surgeon volume in relation to long-term survival after oesophagectomy: systematic review and meta-analysis. *Gut* 2013 doi: 10.1136/gutjnl-2013-306074[published Online First: Epub Date]].
24. Rouvelas I, Lagergren J. The impact of volume on outcomes after oesophageal cancer surgery. *ANZ J Surg* 2010;**80**(9):634-41 doi: 10.1111/j.1445-2197.2010.05406.x[published Online First: Epub Date]].
25. Kassis ES, Kosinski AS, Ross P, Jr., Koppes KE, Donahue JM, Daniel VC. Predictors of anastomotic leak after esophagectomy: an analysis of the society of



- 1  
2  
3 thoracic surgeons general thoracic database. *Ann Thorac Surg* 2013;**96**(6):1919-  
4 26 doi: 10.1016/j.athoracsur.2013.07.119[published Online First: Epub Date]].  
5 26. Abramovitch R, Marikovsky M, Meir G, Neeman M. Stimulation of tumour  
6 growth by wound-derived growth factors. *Br J Cancer* 1999;**79**(9-10):1392-8  
7 doi: 10.1038/sj.bjc.6690223[published Online First: Epub Date]].  
8 27. Tachibana M, Tabara H, Kotoh T, et al. Prognostic significance of  
9 perioperative blood transfusions in resectable thoracic esophageal cancer. *Am J*  
10 *Gastroenterol* 1999;**94**(3):757-65 doi: 10.1111/j.1572-  
11 0241.1999.00948.x[published Online First: Epub Date]].  
12 28. Liu L, Wang Z, Jiang S, et al. Perioperative allogeneic blood transfusion is  
13 associated with worse clinical outcomes for hepatocellular carcinoma: a meta-  
14 analysis. *PLoS One* 2013;**8**(5):e64261 doi:  
15 10.1371/journal.pone.0064261[published Online First: Epub Date]].  
16 29. Uccella S, Ghezzi F, Cromi A, et al. Perioperative allogeneic blood transfusions  
17 and the risk of endometrial cancer recurrence. *Arch Gynecol Obstet*  
18 2013;**287**(5):1009-16 doi: 10.1007/s00404-012-2668-9[published Online First:  
19 Epub Date]].  
20 30. Acheson AG, Brookes MJ, Spahn DR. Effects of allogeneic red blood cell  
21 transfusions on clinical outcomes in patients undergoing colorectal cancer  
22 surgery: a systematic review and meta-analysis. *Ann Surg* 2012;**256**(2):235-44  
23 doi: 10.1097/SLA.0b013e31825b35d5[published Online First: Epub Date]].  
24  
25  
26  
27  
28  
29  
30  
31  
32  
33  
34  
35  
36  
37  
38  
39  
40  
41  
42  
43  
44  
45  
46  
47  
48  
49  
50  
51  
52  
53  
54  
55  
56  
57  
58  
59  
60

1  
2  
3  
4  
5  
6  
7  
8  
9  
10  
11  
12  
13  
14  
15  
16  
17  
18  
19  
20  
21  
22  
23  
24  
25  
26  
27  
28  
29  
30  
31  
32  
33  
34  
35  
36  
37  
38  
39  
40  
41  
42  
43  
44  
45  
46  
47  
48  
49  
50  
51  
52  
53  
54  
55  
56  
57  
58  
59  
60

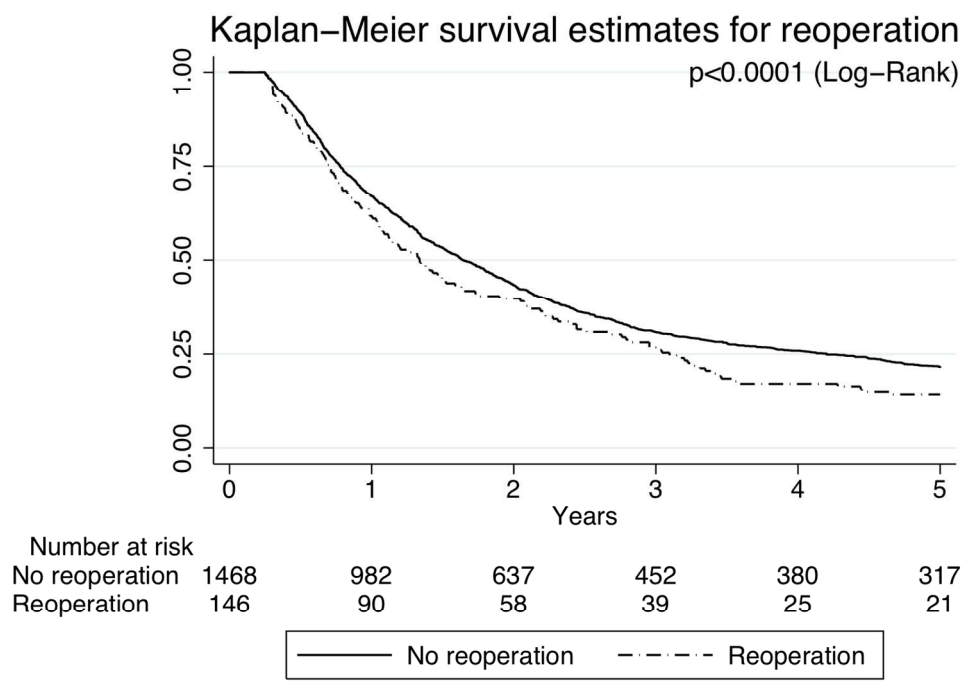

Kaplan-Meier survival curve for survival between 90 days and 5 years with respect to occurrence of reoperation among 1614 patients undergoing oesophageal cancer surgery in 1987-2010 in Sweden  
139x101mm (300 x 300 DPI)

Peer review only
